# 1 EWI-2 Inhibits Cell-Cell Fusion at the HIV-1 2 Virological Presynapse

3 Emily E. Whitaker<sup>1,2</sup>, Nicholas J. Matheson<sup>3,4</sup>, Sarah Perlee<sup>1#</sup>, Phillip B. Munson<sup>2,5†</sup>, Menelaos  
4 Symeonides<sup>1,2‡</sup>, and Markus Thali<sup>1,2\*</sup>

5 <sup>1</sup>University of Vermont, Department of Microbiology and Molecular Genetics, Burlington, VT, USA

6 <sup>2</sup>University of Vermont, Graduate Program in Cellular, Molecular, and Biomedical Sciences, Burlington, VT,  
7 USA

8 <sup>3</sup>Department of Medicine, University of Cambridge, Cambridge, UK

9 <sup>4</sup>Cambridge Institute for Therapeutic Immunology and Infectious Disease (CITIID), University of Cambridge,  
10 Cambridge, UK

11 <sup>5</sup>University of Vermont, Department of Pathology and Laboratory Medicine, Burlington, VT, USA

12 <sup>#</sup>Current affiliation: Memorial Sloan Kettering Cancer Center, Louis V. Gerstner, Jr. Graduate School of  
13 Biomedical Sciences, New York, NY, USA

14 <sup>†</sup>Current affiliation: Massachusetts General Hospital, Cutaneous Biology Research Center, Charlestown, MA,  
15 USA

16 <sup>‡</sup>Co-senior authors

17 \* Correspondence: [markus.thali@uvm.edu](mailto:markus.thali@uvm.edu)

18 **Abstract:** Cell-to-cell transfer of virus particles at the Env-dependent virological synapse (VS) is a  
19 highly efficient mode of HIV-1 transmission. While cell-cell fusion could be triggered at the VS,  
20 leading to the formation of syncytia and preventing exponential growth of the infected cell  
21 population, this is strongly inhibited by both viral (Gag) and host (ezrin and tetraspanins) proteins.  
22 Here, we identify EWI-2, a protein that was previously shown to associate with ezrin and tetraspanins,  
23 as a host factor that contributes to the inhibition of Env-mediated cell-cell fusion. Using quantitative  
24 fluorescence microscopy, shRNA knockdowns, and cell-cell fusion assays, we show that EWI-2  
25 accumulates at the presynaptic terminal (i.e. the producer cell side of the VS), where it contributes to  
26 the fusion-preventing activities of the other viral and cellular components. We also find that EWI-2,  
27 like tetraspanins, is downregulated upon HIV-1 infection, mostly by Vpu. Despite strong inhibition  
28 of fusion at the VS, T cell-based syncytia do form *in vivo* and in physiologically relevant culture  
29 systems, but they remain small. In regard to that, we demonstrate that EWI-2 and CD81 levels are  
30 restored on the surface of syncytia, where they (presumably) continue to act as fusion inhibitors. This  
31 study documents a new role for EWI-2 as an inhibitor of HIV-1-induced cell-cell fusion, and provides  
32 novel insight into how syncytia are prevented from fusing indefinitely.

33 **Keywords:** EWI-2, IGSF8, tetraspanin, HIV, cell-cell fusion, virological synapse, T cell, syncytia  
34

---

## 35 1. Introduction

36 HIV-1 spreads between T cells primarily through two modes of transmission: the release of cell-  
37 free virus particles followed by their uptake by (more or less distantly located) cells expressing the viral  
38 receptor/co-receptor, and cell-to-cell transmission of particles to an adjacent cell via the virological  
39 synapse (VS), i.e. when infected and uninfected cells transiently align. Formation of the HIV-1 VS is  
40 initiated by the viral envelope glycoprotein (Env) on the surface of productively infected cells binding  
41 to its receptor, CD4, on target T cells [1], and is followed by polarization of Gag at the cell-cell contact  
42 site [1,2]. Virus particles are then released in high concentrations towards the target cell [3], facilitating

43 efficient infection while also possibly shielding virus particles from some neutralizing antibodies ([4]  
44 and recently reviewed in [5]). Indeed, as demonstrated in a recent study using physiologically relevant  
45 cell culture systems [6], it is possible that virus that is not released in close proximity to a target cell is  
46 rapidly inactivated, emphasizing the importance of VS-mediated transmission. Given, however, that  
47 Env is fusogenic at neutral pH, it would seem likely at first that VS-mediated contacts should frequently  
48 result in cell-cell fusion, thus forming a multinucleated infected cell (syncytium). While we now know  
49 that small, T cell-based syncytia arise early in HIV-1 infection and can spread virus by cell-cell contact  
50 [7-12], the majority of infected T cells observed in lymphoid tissue are mononucleated, documenting  
51 that most HIV-1 VSs ultimately result in complete cell separation and generation of a new, productively  
52 infected cell. This is likely due to tight regulation at the VS that acts to prevent excessive syncytium  
53 formation (reviewed in [13,14]).

54 Multiple independent studies have identified viral and host functions which, together, prevent  
55 excessive HIV-1-induced cell-cell fusion at the VS. Firstly, Env is rapidly downregulated from the  
56 surface of infected cells in the absence of Gag [15,16]. Secondly, upon Gag multimerization at the  
57 plasma membrane, Env is trapped by immature Gag through Env's cytoplasmic tail and maintained in  
58 a poorly fusogenic state [17]. This trapping by Gag ends only after Env's incorporation into virus  
59 particles, when Gag precursor gets cleaved, i.e. upon maturation [18-21]. The residual fusion activity of  
60 Gag-trapped Env on infected cells has been shown to be inhibited by several host membrane proteins  
61 that accumulate at the producer cell side of the VS, including tetraspanins and phosphorylated ezrin  
62 (p-ezrin) [22-24]. Tetraspanins inhibit HIV-1-induced cell-cell fusion at a post-hemifusion stage [23],  
63 while ezrin is implicated in F-actin organization and recruitment of the tetraspanin CD81 to the VS [24].  
64 It remains unclear how and whether these protein functions are coordinated, though based on other  
65 cell-cell fusion regulation paradigms (discussed below), additional host proteins are likely required to  
66 mediate efficient inhibition of HIV-1-induced fusion by tetraspanins and ezrin.

67 EWI-F (CD9P-1/FPRP) is an immunoglobulin superfamily (IgSF) member and partner of  
68 tetraspanins CD9 and CD81 [25]. EWI-F was shown to be a potent inhibitor of cell-cell fusion in  
69 myoblasts, where EWI-F knockout resulted in more frequent fusion than CD9/CD81 double knockout  
70 [26]. However, EWI-F is poorly expressed in T cells [27], the primary host cell type for HIV-1. A related  
71 protein, EWI-2 (IGSF8/PGRL) [28,29], which also associates with tetraspanins and is expressed in T cells  
72 [25,27], has been documented to play a role in HCV entry [30,31] and T cell immunological synapse (IS)  
73 formation [32]. That latter study also suggested that EWI-2 has a yet undetermined involvement in  
74 HIV-1 particle production [32]. Furthermore, both EWI-F and EWI-2 interact with ezrin to organize the  
75 cytoskeleton in concert with tetraspanins [27]. EWI-2 thus lies at the nexus of tetraspanins, ezrin, and  
76 the actin cytoskeleton (which can also inhibit cell-cell fusion; [33]).

## 77 2. Materials and Methods

### 78 2.1 Cell Lines and Cell Culture

79 The following cells were obtained through the NIH AIDS Reagent Program, Division of AIDS,  
80 NIAID, NIH: HeLa cells from Dr. Richard Axel [34], TZM-bl cells from Dr. John C. Kappes, Dr. Xiaoyun  
81 Wu, and Tranzyme Inc. [35-39], CEM.NKR CCR5+Luc+ (CEM-luc) cells from Dr. John Moore and Dr.  
82 Catherine Spencehauer [40,41], CEM-T4 cells from Dr. J.P. Jacobs [42], and CEM-SS cells from Dr. Peter  
83 L. Nara [34,43,44].

84 HEK 293T, HeLa, and TZM-bl cells were maintained in Dulbecco's Modification of Eagle's  
85 Medium (DMEM) (Corning, Corning, NY, Cat. #10-017-CV) containing 10% fetal bovine serum (FBS;  
86 Corning, Cat. #35-010-CV) and antibiotics (100 units/mL penicillin and 100 µg/mL streptomycin;  
87 Invitrogen). CEM-luc cells were maintained in RPMI 1640 medium (Corning, Cat. #10-104-CV)  
88 supplemented with 10% FBS and 0.8 mg/mL geneticin sulfate (G418). CEM2n, a kind gift from R. Harris  
89 [45], and CEM-SS cells were maintained in RPMI medium supplemented with 10% FBS and antibiotics.

90 Human primary blood mononuclear cells (PBMCs) were isolated as buffy coats from whole blood  
91 of healthy donors by Ficoll density centrifugation. CD4<sup>+</sup> T cells were enriched from PBMCs by negative

92 selection using the MACS CD4<sup>+</sup> T Cell Isolation Kit (Miltenyi Biotec, Auburn, CA, Cat. #130-096-533) or  
93 the EasySep Human CD4<sup>+</sup> T Cell Isolation Kit (STEMCELL Technologies, Vancouver, BC, Canada, Cat.  
94 #17952) according to manufacturer's instructions. Primary CD4<sup>+</sup> T cells were activated in RPMI  
95 containing 10% FBS, 50 units/mL IL-2, antibiotics, and 5 µg/mL phytohemagglutinin. After 48 h of  
96 activation, cells were washed and subsequently maintained and expanded in the same medium but  
97 without phytohemagglutinin. Cells were used for infections at 4 to 7 days post isolation.

## 98 2.2 Antibodies

99 Mouse monoclonal antibody (mAb) to EWI-2 (8A12) was a kind gift from Dr. Eric Rubinstein [25].  
100 Mouse mAb to HIV-1 p24 (AG3.0) was obtained through the NIH AIDS Reagent Program, Division of  
101 AIDS, NIAID, NIH, from Dr. Jonathan Allan [46]. Rabbit antiserum to HIV-1 p6 was a kind gift from  
102 David E. Ott. Rabbit polyclonal antibody (pAb) to HIV-1 p24 was obtained from Advanced  
103 Biotechnologies (Cat. #13-203-000). Secondary antibodies were as follows: Alexa Fluor 488-conjugated  
104 donkey pAb to mouse IgG (Invitrogen, Cat. #A21202), Alexa Fluor 488-conjugated donkey pAb to  
105 rabbit IgG (Invitrogen Cat. #A21206), Alexa Fluor 594-conjugated donkey pAb to mouse IgG  
106 (Invitrogen Cat. #R37115), Alexa Fluor 594-conjugated donkey pAb to rabbit IgG (Invitrogen Cat.  
107 #A21207), Alexa Fluor 647-conjugated donkey pAb to mouse IgG (Invitrogen Cat. #A31571), and Alexa  
108 Fluor 647-conjugated goat pAb to mouse IgG (Invitrogen Cat. #A21235). Zenon labeling of primary  
109 antibodies with either Alexa Fluor 488 or Alexa Fluor 594 was carried out using Zenon Labeling Kits  
110 according to the manufacturer's instructions (Molecular Probes, Eugene, OR, Cat. #Z25002 and  
111 #Z25007).

## 112 2.3 Plasmids and Virus Strains

113 pcDNA3, pCDNA3.1, and pCMV SPORT6 (Invitrogen) were vectors for EWI-2, CD81, and L6  
114 overexpression, respectively (EWI-2 was a kind gift from Dr. Eric Rubinstein; Université Paris-Sud,  
115 Villejuif, France). Proviral plasmids pNL4-3 and pNL4-3 ΔEnv (KFS) were kind gifts from Dr. Eric Freed  
116 (National Cancer Institute, Frederick, MD, USA) [47]. NL4-3-derived fluorescent protein-tagged  
117 proviral plasmids pNL-sfGI, pNL-sfGI ΔEnv, pNL-CI, and pNL-CI ΔEnv [10] were kind gifts from Dr.  
118 Benjamin Chen (Mount Sinai School of Medicine, New York, NY). Vesicular stomatitis virus  
119 glycoprotein (VSV-G) was used to pseudotype viral stocks produced in HEK 293T cells. The lentiviral  
120 vector FG12 [48], previously modified to include a puromycin resistance cassette [24], was further  
121 modified to remove the GFP reporter cassette by digestion with AfeI and PshAI and subsequent blunt-  
122 end religation.

## 123 2.4 Virus Stocks and Infections

124 VSV-G-pseudotyped virus stocks of NL4-3, NL4-3 ΔEnv, NL-sfGI, NL-CI, and NL-CI ΔEnv were  
125 produced in HEK 293T cells transfected with the proviral plasmid and pVSV-G (at 17:3 ratio) using  
126 calcium phosphate precipitation. For shRNA encoding lentiviruses, shEWI-2 and shScramble, stocks  
127 were produced in HEK 293T cells transfected with FG12-shRNA vector, ΔR8.2 packaging vector, and  
128 pVSV-G (at a ratio of 3:7:1. Supernatants were harvested 2 days after transfection, cleared by  
129 centrifugation at 2000 rcf for 10 min, filtered, and stored at -80 °C.

130 To infect CEM2n cells by spinoculation, two million cells were incubated with RPMI/10% FBS  
131 containing 90 µL of virus stock (resulting in ~3% of the cells being infected) or medium alone (for  
132 uninfected controls), for 20 min at 37 °C, followed by centrifugation at 1200 rcf for 2 h at 37 °C. Cell  
133 pellets were allowed to recover at 37 °C for 15 min, centrifuged at 300 rcf for 2 min, and resuspended  
134 in fresh RPMI/10% FBS. Cells were incubated at 37 °C, the medium was refreshed 2 days post infection,  
135 and the cells were used 1 day later for all subsequent experiments.

136 To infect primary CD4<sup>+</sup> T cells, 1 or 2 million cells were incubated in RPMI/10% FBS/IL-2  
137 containing 200 or 400 µL of virus, respectively, and spinoculated as described above. Cells were

138 resuspended in fresh RPMI/10% FBS/PS/IL-2 and incubated at 37 °C/5% CO<sub>2</sub>. Cells were used 2 days  
139 post infection for all subsequent experiments.

140 To infect CEM-SS cells by shaking, one or two million cells suspended in CO<sub>2</sub>-independent  
141 medium (Gibco) supplemented with 10% FBS were mixed with VSV-G-pseudotyped virus stocks and  
142 shaken at 220 rpm for 2 h at 37 °C. Cells were then washed and plated in fresh RPMI/10% FBS, and used  
143 for experiments as described. For CEM-SS infection by spinoculation, the procedure was performed as  
144 described above with some modifications; one or two million cells were incubated in RPMI/10% FBS  
145 containing 40-50 µL (analyzing surface expression and post-synapse enrichment, respectively) of virus  
146 stock or medium alone (for uninfected controls). Following spinoculation, cells were incubated at 37 °C  
147 for 2 days before being used for subsequent experiments.

#### 148 *2.5 Imaging and quantification of EWI-2 accumulation at the VS*

149 CEM-SS and primary CD4<sup>+</sup> T cells were infected by shaking or spinoculation, respectively, with  
150 VSV-G-pseudotyped WT or ΔEnv virus then treated as follows: For CEM-SS cells, two days post  
151 infection, uninfected CEM-SS target cells were labeled with CMAC (Invitrogen) according to  
152 manufacturer's instructions, mixed with infected cells at a 1:1 or 1:2 ratio (infected:target), seeded onto  
153 the microwell of a 35 mm glass-bottom dish (MatTek Corporation, Ashland, MA, Cat. #P35G-1.5-14-C)  
154 coated with poly-L-Lysine (Sigma), and incubated at 37 °C for 3 to 4.5 h. Cells were then chilled on ice  
155 and surface-labeled with 1:200 mouse anti-EWI-2 mAb in RPMI/10% FBS for 45 min at 4 °C. Surface-  
156 labeled cells were fixed with 4% PFA in PBS at 4 °C for 10 min, and blocked and permeabilized  
157 overnight with 1% BSA and 0.2% Triton X-100 in PBS (block/perm buffer). All CEM-SS conditions were  
158 labeled with Alexa Fluor 647-conjugated anti-mouse secondary pAb in block/perm buffer at 1:500  
159 dilution. Cells were subsequently stained with Alexa Fluor 594 Zenon-labeled anti-p24 AG3.0 mouse  
160 mAb, and fixed again with 4% PFA in PBS. Cells were kept in PBS for imaging.

161 For primary cells, uninfected cells were mixed with infected cells at a 1:1 ratio (infected:target),  
162 seeded onto 8-well glass-bottom plates (CellVis, Mountain View, CA, Cat. #C8-1.5H-N) coated with  
163 1:10 poly-L-Lysine in double-distilled water (ddH<sub>2</sub>O), and incubated for 2 to 2.5 h at 37 °C. Cells were  
164 surface-labeled for EWI-2 and fixed as above, then blocked and permeabilized with block/perm buffer  
165 for 10 min. Cells were then labeled with a mixture of rabbit anti-p24 and anti-p6 antibodies, each at  
166 1:1000 dilution, in PBS with 1% BSA (block) for 45 min. Subsequently, cells were labeled with Alexa  
167 Fluor-conjugated secondary pAbs as indicated. Cells were kept in PBS for imaging.

168 To visualize only producer cell-associated EWI-2 at the VS, 10,000 target TZM-bl cells (which have  
169 nearly-undetectable levels of EWI-2; unpublished observation) were seeded onto 8-well glass-bottom  
170 plates coated with 1:10 poly-L-Lysine in ddH<sub>2</sub>O. The next day, those TZM-bl cells were labeled with  
171 CMAC at 1:250 dilution in serum-free DMEM, and then co-cultured with 150,000 CEM-SS cells (either  
172 uninfected or infected with NL-CI or NL-CI ΔEnv 2 days prior as described above) per well for 2.5  
173 hours at 37 °C in RPMI/10% FBS. The cells were then surface-labeled with 1:200 mouse anti-EWI-2 mAb  
174 in RPMI/10% FBS on ice for 45 min. Cells were subsequently fixed with 4% PFA in PBS and  
175 permeabilized with block/perm for 10 min. After permeabilization, the cells were labeled using a  
176 mixture of rabbit anti-p24 and anti-p6 antibodies, each at 1:1000 dilution, in block for 45 min. Cells were  
177 subsequently labeled using Alexa Fluor-conjugated secondary pAbs (anti-mouse-Alexa Fluor 647 and  
178 anti-rabbit-Alexa Fluor 488) each at 1:500 in block for 45 minutes. Cells were kept in PBS for imaging.

179 To visualize only target cell-associated EWI-2 at the VS, HeLa producer cells (which have nearly-  
180 undetectable levels of EWI-2; unpublished observation) were plated (10,000 cells per well) in 8-well  
181 glass-bottom plates coated with 1:10 poly-L-Lysine in ddH<sub>2</sub>O. Twenty-four hours later, cells were  
182 transfected with NL-sfGI, NL-sfGI ΔEnv, or empty vector, using FuGENE6 transfection reagent at a  
183 ratio of 3:1 (FuGENE6:DNA) according to manufacturer's instructions (Promega, Madison, WI, Cat.  
184 #E2691) . Twenty-four hours post-transfection, 100,000-150,000 uninfected CEM-SS cells (labeled with  
185 CMAC at a 1:250 dilution in serum-free RPMI) were added to form VSs with provirus-transfected HeLa  
186 cells. After 2-2.5 h of coculture, cells were surface-labeled with 1:200 mouse anti-EWI-2 mAb in  
187 RPMI/10% FBS for 45 min at 4 °C. Surface-labeled cells were fixed with 4% PFA in PBS at 4 °C for 10



188 min, and then incubated with block/perm for 10 min, before labeling with a mixture of rabbit anti-p24  
189 and anti-p6 antibodies, each at 1:1000 dilution, in block for 45 min. Subsequently, cells were labeled  
190 with secondary pAbs (anti-mouse-Alexa Fluor 647 and anti-rabbit-Alexa Fluor 594), each at 1:500 in  
191 block. Cells were kept in PBS for imaging.

192 Images were acquired on a DeltaVision epifluorescence microscope (GE/Applied Precision,  
193 Issaquah, WA, USA) with an Olympus IX-70 base using an Olympus 60× PlanApo 1.42 NA objective  
194 and equipped with a CoolSNAP HQ CCD camera (Photometrics). Images were imported into Fiji  
195 Version 2.0.0-rc-69/1.52p [49] for analysis following deconvolution and cropping using Softworx  
196 software. The VS was identified using the Gag channel and the level of EWI-2 accumulation was  
197 determined by measuring its signal intensity at the VS. For  $\Delta$ Env controls, cell-cell contacts were  
198 identified using the differential interference contrast (DIC) channel and treated analogous to a VS. The  
199 EWI-2-associated signal intensity at non-contact sites was determined by manually outlining the  
200 surface of the cell, excluding any regions that were in contact with an adjacent cell, and calculating the  
201 mean EWI-2 intensity within the selected area. To determine the level of enrichment at the VS (or cell-  
202 cell contact for  $\Delta$ Env controls), an “unbiased” approach was applied to account for EWI-2 signal  
203 contributed by both the target and producer cell at each VS/contact. Enrichment was calculated as the  
204 EWI-2 signal intensity at the VS/contact divided by the sum of the EWI-2 signal at non-contact sites of  
205 the producer and target cell in that particular VS/contact. A “biased” approach, where only the  
206 producer cell’s non-contact sites were used to normalize the VS/contact signal, yielded very similar  
207 results to the unbiased approach described above (unpublished observations).

## 208 *2.6 Proteomic analysis of EWI-2 levels in HIV-1 infected cells*

209 To identify HIV-1-dependent changes in abundance of total EWI-2, we re-analysed data from 2  
210 previous studies [50,51]. In brief, primary human CD4<sup>+</sup> T cells were infected with pNL4-3- $\Delta$ Env-Nef-  
211 P2A-SBP- $\Delta$ LNGFR (HIV-AFMACS) at MOI $\leq$ 0.5, enriched by Antibody-Free Magnetic Cell Sorting  
212 (AFMACS) [52] and analysed 48 h after infection [51]. CEM-T4 T cells were infected with pNL4-3- $\Delta$ Env-  
213 EGFP at MOI=1.5 and analysed 48 h after infection [50]. TMT-labeled tryptic peptides from whole cell  
214 lysates were subjected to off-line High pH Reversed-Phase (HpRP)-HPLC fractionation and analysed  
215 using an Orbitrap Fusion Tribrid mass spectrometer (Thermo Scientific) coupled to a Dionex UltiMate  
216 3000 UHPLC (Thermo Scientific). Details of sample processing and data analysis have been previously  
217 described [50,51] and proteomic data from primary human CD4<sup>+</sup> T cells are available from the  
218 ProteomeX-change Consortium using dataset identifier PXD012263  
219 (<http://proteomecentral.proteomexchange.org>).

220 To characterise HIV-1-dependent changes in abundance of plasma membrane EWI-2, we re-  
221 analysed data from a previous study [53]. In brief, for the TMT-based time course experiment, CEM-T4  
222 T cells were infected with pNL4-3- $\Delta$ Env-EGFP at MOI=10 and analysed at the indicated time points  
223 after infection. For the SILAC-based single time point experiments, cells were pre-labeled with light,  
224 medium or heavy lysine and arginine and either infected with WT or Vpu-/Nef-deficient pNL4-3- $\Delta$ Env-  
225 EGFP at MOI=10 and analysed 72 h after infection, or transduced with GFP or Vpu/Nef and selected  
226 with puromycin. Sialylated cell surface glycoproteins were enriched by selective aminoxy-  
227 biotinylation followed by immunoaffinity purification using streptavidin-conjugated beads (Plasma  
228 Membrane Profiling). Tryptic peptides were labeled with TMT reagents (time course experiment only),  
229 subjected to off-line High pH Reversed-Phase (HpRP)-HPLC fractionation and analysed using an  
230 Orbitrap Fusion Tribrid mass spectrometer (Thermo Scientific) coupled to a Dionex UltiMate 3000  
231 UHPLC (Thermo Scientific). Details of sample processing and data analysis have been previously  
232 described [53] and time course proteomic data are available from the ProteomeX-change Consortium  
233 using dataset identifier PXD002934 (<http://proteomecentral.proteomexchange.org>).

## 234 *2.7 Determining surface levels of EWI-2 by microscopy*

235 To compare EWI-2 surface expression between infected and uninfected cells, CEM-SS, CEM2n  
236 cells, and primary CD4<sup>+</sup> T cells were infected with VSV-G-pseudotyped NL-sfGI as described above.

237 Two to three days post infection,  $3 \times 10^5$  infected cells were plated onto each well of 8-well glass-bottom  
238 plates coated with 1:10 poly-L-Lysine in ddH<sub>2</sub>O. Two additional wells were used for uninfected  
239 controls. After 2 h of incubation at 37 °C, the medium was replaced with ice cold RPMI/10% FBS  
240 containing mouse anti-EWI-2 mAb at 1:200 dilution for surface labeling, and incubated for 45 min at 4  
241 °C. Following the primary antibody incubation, cells were washed with RPMI/10% FBS and fixed with  
242 4% PFA in PBS for 10 min at 4 °C, blocked and permeabilized with PBS containing 1% BSA and 100  
243 µg/mL digitonin for 10 min, and incubated with the indicated secondary antibody in block for 45 min  
244 at room temperature. Cells were washed with block and imaged in PBS. At least 50 fields containing  
245 infected cells were selected for each biological replicate and imaged, deconvolved, and cropped using  
246 the DeltaVision microscope and Softworx software described above. After deconvolution, Fiji was used  
247 to manually select the cell surface at the midline of each cell and the mean intensity of EWI-2-associated  
248 signal was quantified and subsequently subtracted by the mean intensity of an area that did not contain  
249 cells. Cell-cell contact sites were excluded from the quantification. Background subtracted intensity  
250 values of all cells were normalized to the average surface associated intensity of the entire uninfected  
251 cell population, internal controls contained in the same wells as infected cells, contained within  
252 respective biological replicates. This normalization allowed for direct comparison of surface expression  
253 trends between biological replicates that accounts for potential variation in protein labeling efficiency  
254 between replicates. The virus-associated fluorescent reporter channel was used to segregate  
255 measurements into uninfected and infected. The data shown in Figure 3B are pooled from 2-3  
256 independent biological replicates, each consisting of 2 technical replicates, all of which were sampled  
257 randomly until a minimum of 50 infected cells were quantified.

258 To compare EWI-2 surface expression levels between mononucleated infected cells and HIV-1-  
259 induced syncytia, primary CD4<sup>+</sup> T cells were infected with VSV-G-pseudotyped virus as described  
260 above. Three days post infection,  $3 \times 10^5$  infected cells were plated onto each well of 8-well glass-bottom  
261 plates coated with 1:10 poly-L-Lysine in ddH<sub>2</sub>O alongside two wells of uninfected cells as controls.  
262 Cells were incubated at 37 °C for 2 h and surface labeled as described above using either mouse anti-  
263 EWI-2 or mouse anti-CD81 mAb at 1:200 or 1:100, respectively. Samples were fixed, permeabilized, and  
264 labeled with appropriate AlexaFluor conjugated antibodies and DAPI as described above. Cells were  
265 imaged in PBS and at least 50 fields containing 10-20 cells each, and containing at least some infected  
266 cells with multinucleated appearance (determined by DAPI and GFP signal) were selected for each  
267 biological replicate and imaged, deconvolved, and cropped as described above. Fiji was then used to  
268 analyze the surface expression of each protein of interest as described above. The virus-associated  
269 fluorescent reporter channel (GFP) was used to segregate measurements into infected and uninfected  
270 populations, and nuclear staining (DAPI) was used to further segregate infected cells into  
271 mononucleated and multinucleated infected cells. The EWI-2/CD81 channel was not viewed at all  
272 during imaging and field selection, or throughout image processing. The data shown in Figure 5 are  
273 pooled from 2-3 biological replicates, with two technical replicates each, all of which were sampled  
274 randomly until a minimum of 15 syncytia per biological replicate were quantified.

## 275 *2.8 Determining surface EWI-2 signal on infected cells by flow cytometry*

276 CEM2n cells infected as described above were harvested after three days and incubated in cold  
277 PBS with 5 mM EDTA for 15 min ( $3.0 \times 10^5$  cells/tube). Cells were pelleted at 400 rcf for 7 min at 4 °C  
278 and resuspended in cold RPMI/10% FBS containing mouse anti-EWI-2 mAb at 1:200 dilution. After a  
279 45 min incubation at 4 °C, cells were washed with cold RPMI/10% FBS and resuspended in ice cold PBS  
280 with 5 mM EDTA. To fix, an equal volume of PBS with 8% PFA was added and samples were incubated  
281 on ice for 10 min. Cells were washed and stained with Alexa Fluor 594-conjugated secondary antibody  
282 at 1:500 in block for 45 min at room temperature, before being washed, resuspended in PBS, and  
283 analyzed using a BD LSRII flow cytometer. Data were analyzed using FlowJo V10 (Becton, Dickinson  
284 & Company, Franklin Lakes, NJ). Samples were gated for infected and uninfected populations by GFP  
285 expression. EWI-2<sup>high</sup> and EWI-2<sup>low</sup> gates were set based in part on controls lacking primary antibody,  
286 and in part by adjusting the gates to reflect the number of uninfected EWI-2<sup>high</sup> cells as measured by

287 microscopy. The data shown are the collection of 3 independent biological replicates, each consisting  
288 of 2 technical replicates.

### 289 2.9 Establishment of EWI-2 knockdown CEM-SS cells

290 The shRNA-encoding sequences targeting either EWI-2 (modified from previously described  
291 EWI-2-targeting siRNA [27] or a scrambled control, were introduced to the lentiviral vector FG12 (as  
292 described in 2.3) using oligos containing shRNA sequences, a loop sequence, and an AgeI site,  
293 flanked by BbsI and XhoI restriction site overhangs, as previously described [24], (EWI-2 sense, 5'-  
294 ACCGGGGCTTCGAAAACGGTGATCTTCAAGAGAGATCACCGTTTTCGAAGCCCTTTTTTACCG  
295 GTC-3', and anti-sense, 5'-  
296 TCGAGACCGGTAAAAAAGGGCTTCGAAAACGGTGATCTCTCTTGAAGATCACCGTTTTTCGAA  
297 GCCC-3' ; scramble sense, 5'-  
298 ACCGGGCAGATGCGTCCAGTTAGATTCAAGAGATCTAACTGGACGCATCTGCCTTTTTTACCG  
299 GTC-3', and anti-sense, 5'-  
300 TCGAGACCGGTAAAAAAGGCAGATGCGTCCAGTTAGATCTCTTGAATCTAACTGGACGCATC  
301 TGCC-3'). A PolII promoter was first obtained by ligating the oligo with PBS-hU6 digested with BbsI  
302 and XhoI restriction endonucleases (New England BioLabs, Ipswich, MA). The PolII-shRNA  
303 constructs were obtained by digesting the resulting PBS-hU6 vector with XbaI and XhoI, and the  
304 insert was subsequently ligated into the FG12 vector digested with the same enzymes.

305 VSV-G pseudotyped FG12-shRNA lentiviruses were used to transduce CEM-SS cells by  
306 spinoculating one million cells with 500  $\mu$ L of lentiviral supernatant (either shEWI-2 or shScramble).  
307 Cells were incubated at 37 °C for two-days in RPMI/10% FBS and positively transduced cells were then  
308 selected for puromycin resistance by supplementing the media with 0.5  $\mu$ g/mL of puromycin for 8 days.  
309 shEWI-2 and shScramble CEM-SS cells were subsequently maintained in RPMI/10% FBS/0.25  $\mu$ g/mL  
310 puromycin.

311 EWI-2 knockdown was analyzed by flow cytometry and microscopy. For flow cytometry analysis,  
312  $3.0 \times 10^5$  shScramble and shEWI-2 cells, alongside parental CEM-SS controls, were pelleted at 400 rcf  
313 for 7 min, resuspended in 1:1000 Live/Dead Fixable Near-IR stain (ThermoFisher Scientific) in PBS for  
314 30-45 min, washed with RPMI/10% FBS and fixed for 10 min in 4% PFA in PBS by resuspending the  
315 cells in PBS and then adding an equal volume of 8% PFA in PBS. Fixed samples were washed with 1  
316 mL of PBS, blocked and permeabilized in 100  $\mu$ L of block/perm buffer for 10 min, and washed with  
317 PBS containing 1% BSA. EWI-2 was labeled using mAb 8A12 diluted 1:200 in block for 45 min, washed  
318 with block, and stained with Alexa Fluor 488-conjugated secondary antibody in block for 45 min. Cells  
319 were then washed and resuspended in PBS for flow cytometry analysis using a BD LSRII flow  
320 cytometer. Data were analyzed using FlowJo V10. Samples were gated for live cells, and EWI-2  
321 expression was measured by the mean fluorescence intensity of EWI-2 signal in the live cell population  
322 and normalized to the parental control expression within each biological replicate. Data are the result  
323 of 3 independent biological replicates with 2 technical replicates each. For microscopy,  $2.5 \times 10^5$   
324 shScramble and shEWI-2 cells, alongside parental CEM-SS controls, were plated on 8-well glass bottom  
325 plates coated with 1:10 poly-L-lysine in ddH<sub>2</sub>O. After 2 h at 37 °C, cells were fixed for 10 min using 4%  
326 PFA in PBS, washed, and incubated with block/perm for 10 min. Cells were washed with block and  
327 incubated with 1:200 mAb 8A12 for 45 min, washed, and stained with 1:500 Alexa Fluor 647-conjugated  
328 secondary antibody and 1:2500 DAPI in block for 45 min. Cells were washed with block and imaged in  
329 PBS using a 60 $\times$  objective as described above. Images were deconvolved and cropped by DeltaVision  
330 microscope and Softworx software described above and imported into Fiji for analysis.

### 331 2.10 CEM-luc-based HIV-1-induced cell-cell fusion assay

332 Two million shScramble or shEWI-2 cells were spinoculated as described above with 1.7 or 2  $\mu$ L  
333 of VSV-G pseudotyped NL4-3, alongside parental CEM-SS cells spinoculated with 25  $\mu$ L of VSV-G  
334 pseudotyped NL4-3  $\Delta$ Env to achieve an infection rate of ~30% for each condition. Cells were incubated  
335 at 37 °C for 2 days and then co-cultured with uninfected CEM-luc cells in RPMI/10% FBS containing

336 the following drug treatments; 1:1000 DMSO for vehicle control, 1  $\mu$ M Efavirenz (EFV) (NIH AIDS  
337 Reagent Program, Cat. #4624) to inhibit transmission, or 1  $\mu$ M EFV with 0.5  $\mu$ M HIV-1 IIIB C34 peptide  
338 (C34) (NIH AIDS Reagent Program, Cat. #9824) to inhibit both transmission and cell-cell fusion. 24 h  
339 later, the co-culture medium was refreshed and all conditions were incubated at 37 °C in RPMI/10%  
340 FBS containing 1  $\mu$ M EFV and 0.5  $\mu$ M C34. 24 h later, cells were pelleted at 1000 rcf for 5 min at 4 °C  
341 and resuspended in luciferase reporter lysis buffer (Promega, Cat. #E4530) with 1% protease inhibitor  
342 cocktail (Millipore Sigma, Darmstadt, Germany, Cat. #P8340) to lyse on ice for 15 min. Lysates were  
343 cleared by centrifugation at 20,000 rcf for 5 min at 4 °C and stored at -80 °C until use for luciferase  
344 activity assays.

345 In parallel, infected cells were prepared for flow cytometry analysis alongside uninfected controls,  
346 to determine the infection rate across each condition at the start of the co culture with uninfected CEM-  
347 luc cells. Cells were pelleted and resuspended in 1:1000 Live/Dead Fixable Near-IR stain in PBS as  
348 described above, washed and resuspended in PBS. An equal volume of 8% PFA in PBS was added to  
349 fix the cells in a final concentration of 4% PFA in PBS for 10 min. Cells were washed and resuspended  
350 in block/perm, incubated for 10 min, washed with block, and resuspended for an overnight incubation  
351 in 1:100 AG3.0 in block. Cells were washed and stained with 1:500 Alexa Fluor 488-conjugated  
352 secondary antibody for 45 min followed by a wash with block. Cells were resuspended in PBS and  
353 analyzed by flow cytometry using a BD LSRII flow cytometer. Data was analyzed using FlowJo V10.  
354 Live cells were gated using the Live/Dead signal, and the percentage of infected cells in the live  
355 population was determined by gating on the AG3.0 associated signal.

356 Each lysate was incubated with an equal volume of firefly luciferase reagent (Promega, Cat.  
357 #E1500) for 1 min in a 96-well white-walled plate (ThermoFisher Scientific, Waltham, MA, Cat. #7571)  
358 before collecting luminescence signal intensity on a microplate reader (BioTek Synergy 2). Background  
359 luminescence was determined using a lysis buffer blank and subtracted from all experimental samples.  
360 Relative luminescence units (RLUs) were normalized based on the infection level of each cell type  
361 determined by flow cytometry analysis, and the average RLU value from the  $\Delta$ Env infected, DMSO  
362 treated condition was subtracted from all conditions. All samples treated with both EFV and C34 had  
363 RLU values below that of the  $\Delta$ Env DMSO condition (data not shown), validating the efficacy of the  
364 inhibitors for complete inhibition of transmission to target CEM-luc cells. To determine the proportion  
365 of luciferase expression due to cell-cell fusion, the average RLU value from the EFV-treated condition  
366 (syncytium formation-dependent signal) was divided by that of the DMSO-treated (signal from both  
367 transmission and syncytium formation) and multiplied by 100. Data represent the percentage of  
368 luciferase signal due to syncytium formation between infected shScramble or shEWI-2 cells and  
369 uninfected CEM-luc cells from 3 independent biological replicates each consisting of 1-2 technical  
370 replicates.

### 371 *2.11 HeLa-based HIV-1-induced cell-cell fusion assay*

372 50,000 HeLa cells were plated in each well of a 24-well plate and, the next day, transfected (using  
373 FuGENE6; see section 2.5) in duplicate with 100 ng of either pNL-sfGI or pNL-sfGI  $\Delta$ Env along with  
374 500 ng total expression vector carrying CD81 or EWI-2. L6, a tetraspanin-like protein that does not  
375 inhibit cell-cell fusion, was co-transfected instead of CD81 or EWI-2 as a positive control for maximum  
376 fusion activity. For dose response assays, 125, 250, or 500 ng of either EWI-2 or CD81 plasmid was  
377 "stuffed" with L6 expression plasmid to maintain 500 ng of total protein expression plasmid in each  
378 condition. No cytotoxicity was observed upon transfection for any of the experimental conditions. 24 h  
379 post-transfection, producer HeLa cells were co-cultured with 10<sup>6</sup> TZM-bl target cells (which, upon  
380 producer-target cell fusion, express firefly luciferase under control of the HIV-1 LTR) per well for 3 h  
381 before unattached target cells were washed off and the medium was refreshed. 14-18 h later, cells were  
382 lysed for at least 30 min on ice using 1% Triton X-100, 2mM EDTA, 50 mM Tris-HCl, 200 mM NaCl,  
383 with 1% protease inhibitor cocktail. Lysates were precleared by centrifugation at 20,000 rcf for 5 min at  
384 4 °C and stored at -80 °C until use for luciferase activity assays. Note that the timepoints used here  
385 ensure that there is not enough time for the development of any luciferase signal resulting from



386 productive infection of target TZM-bl cells through virus transmission (unpublished observation) and  
387 that only cell-cell fusion contributes to the luciferase activity measured.

388 Each lysate was incubated with an equal volume of firefly luciferase reagent for 1 min before  
389 collecting luminescence signal intensity on a microplate reader as described above (2.9). Background  
390 luminescence was determined using a lysis buffer blank and subtracted from all experimental samples.  
391 Luminescence intensity was used as a quantitative measurement of relative HeLa-TZM syncytium  
392 formation against the non-fusogenic (therefore incapable of forming syncytia)  $\Delta$ Env control by dividing  
393 each value by the  $\Delta$ Env value (which effectively corresponds to any leaky expression of luciferase in  
394 TZM-bl cells as no cell-cell fusion occurs at all in this condition). To then determine relative fusion  
395 activity of cells transfected with EWI-2 and CD81, those values were normalized to the L6 condition.  
396 Normalized fusion is therefore the fold difference of cell-cell fusion activity taking place when cells  
397 were co-transfected with the indicated amount of either CD81 or EWI-2 plasmid, compared to the  
398 activity taking place when cells were co-transfected with L6. The data shown are the collection of 4  
399 independent biological replicates.

#### 400 *2.12 Statistical Analysis*

401 All statistical analyses were carried out in GraphPad Prism 8 as indicated in Figure legends.

### 402 **3. Results**

#### 403 *3.1 EWI-2 accumulates at the virological presynapse in HIV-1-infected cells*

404 Because EWI-2 is known to associate with ezrin and CD81 [25,27], two cellular factors that  
405 accumulate at the producer cell side of the virological synapse (VS) [24,54], we first sought to determine  
406 whether this protein also localizes to the VS. CEM-SS cells were infected with (VSV-G-pseudotyped)  
407 NL4-3 WT or NL4-3  $\Delta$ Env (virus that does not express Env) and mixed with target CEM-SS cells  
408 (labeled with a cytoplasmic dye). Upon imaging with a 60 $\times$  objective, the VS was identified and defined  
409 by region selection as clusters of immunolabeled Gag present at producer-target cell contact sites. DIC  
410 was used to identify and region-select cell-cell contacts between  $\Delta$ Env producers and uninfected target  
411 cells as Gag will not accumulate at these contacts in the absence of Env [1]. The EWI-2 channel was not  
412 viewed during the process of defining VS/contact regions to eliminate possible bias. To calculate  
413 enrichment at the VS/contact, we divided the EWI-2 signal intensity within the defined VS/contact site  
414 by the sum of the EWI-2 surface intensity at non-contact sites on the producer and target cell at each  
415 VS/contact. This unbiased approach prevents potential inflation of the enrichment value that could  
416 occur if we assumed that EWI-2 was solely contributed by either the target or producer cell. Similarly  
417 to p-ezrin and CD81 [24,54], EWI-2 was observed to co-accumulate with Gag at the VS in an Env-  
418 dependent manner (Figure 1A). EWI-2 signal intensity was ~4-fold enriched at the VS in CEM-SS cells  
419 infected with NL4-3 WT, while no EWI-2 enrichment was seen at cell-cell contacts in cells expressing  
420 NL4-3  $\Delta$ Env (Figure 1A). EWI-2 signal intensity was also enriched ~1.6-fold at the VS in infected  
421 primary CD4<sup>+</sup> T cells at Env-dependent VSs, and was again not enriched at non-VS contact sites ( $\Delta$ Env)  
422 (Figure 1B).

423 To determine whether EWI-2 enrichment at the VS takes place within the infected cell, i.e. at the  
424 presynaptic terminal (rather than the apposed uninfected target cell), HIV-1-infected CEM-SS cells were  
425 co-cultured with uninfected target TZM-bl cells (which have nearly-undetectable levels of EWI-2 on  
426 their surface) and imaged as described above. Significant EWI-2 enrichment (~5.3-fold) was observed  
427 at the VS as before (Figure 2A), demonstrating that the observed EWI-2 accumulation in CEM-SS-CEM-  
428 SS co-cultures takes place at least partially within the producer cell. To evaluate the relative  
429 contribution of any postsynaptic (i.e. target cell-side) accumulation of EWI-2, HIV-1-producing HeLa  
430 cells (which, like TZM-bl cells, also exhibit nearly-undetectable levels of EWI-2 on their surface) were  
431 cocultured with uninfected target CEM-SS cells. In this case, minimal EWI-2 accumulation was detected  
432 at synapses (~1.1-fold; Figure 2B), showing that EWI-2 enrichment seen at T cell-T cell VSs takes place  
433 (almost) exclusively at the presynaptic terminal of the VS, i.e. in the producer cell. Together, these

434 results conclusively document that EWI-2 is recruited to the virological presynapse during HIV-1 cell-  
435 to-cell transmission.

### 436 *3.2 Overall surface levels of EWI-2 are decreased upon HIV-1 infection*

437 Despite its enrichment at the virological presynapse, the EWI-2 partner protein CD81 (as well as  
438 other tetraspanins) is overall downregulated in HIV-1-infected cells [54,56,57]. We previously used  
439 Tandem Mass Tag (TMT)-based quantitative proteomics to map global changes in whole cell protein  
440 abundances in HIV-infected T cells [50,51]. Like CD81, EWI-2 was decreased in abundance in both  
441 CEM-T4 T cells and primary human CD4<sup>+</sup> T cells (Figure 3A). To confirm these data using an orthogonal  
442 approach, we tested whether surface levels of EWI-2 are decreased in lymphocytes infected with HIV-  
443 1 NL-sfGI, a strain in which superfolder GFP (sfGFP) replaces the Nef gene and Nef expression is  
444 restored using an IRES [10]. We chose to utilize this GFP reporter virus, rather than immunolabeling  
445 Gag after fixation, because Gag-negative (or undetectable) cells still in the early phase of infection may  
446 exhibit host protein downregulation due to early Nef expression (reviewed in [58]).

447 HIV-1-infected cells adhered to glass-bottom dishes were surface-labeled with EWI-2 primary  
448 antibody on ice, and fixed before incubation with fluorescent secondary antibody. Uninfected and HIV-  
449 1-infected cells were imaged with a 60× objective and the resulting images were deconvolved. The mean  
450 fluorescence intensity (MFI) of EWI-2 on the surface of each cell was determined by measuring the EWI-  
451 2-associated signal intensity of manually-selected regions of the cell surface (representative images  
452 shown in Figure 3B) and normalizing the raw MFI of each cell to the average EWI-2 signal from  
453 uninfected cells within the same imaging set. After measuring surface MFI, on average across three  
454 independent biological replicates, infected (GFP-expressing) cells had significantly lower (~2-fold)  
455 EWI-2-associated signal than uninfected (GFP-negative) cells, after subtracting background signal  
456 (Figure 3B). This phenomenon was consistent across CEM-SS, CEM2n, and primary CD4<sup>+</sup> T cells.

457 We also sought to quantify EWI-2 surface expression by flow cytometry as a means of high-  
458 throughput analysis. HIV-1 NL-sfGI-infected CEM2n cells, surface-labeled for EWI-2 and analyzed by  
459 flow cytometry, were gated for high or low levels of EWI-2 using appropriate controls (representative  
460 histogram plots shown in Figure 3D). These data showed that a much lower proportion of infected cells  
461 (identified as GFP<sup>+</sup>) had high levels of EWI-2 surface expression than of uninfected cells (identified as  
462 GFP<sup>-</sup>) in the same culture (Figure 3E). Additionally, the mean fluorescence intensity of EWI-2-  
463 associated signal was lower within the total population of infected cells compared to that of the  
464 uninfected cells (Figure 3F).

465 Like other cell surface proteins downregulated by HIV-1, depletion of CD81 (as well as other  
466 tetraspanins) is mediated by the accessory proteins Vpu (predominantly) and Nef [56,57]. We have  
467 previously shown that substrates of different HIV-1 accessory proteins may be distinguished by their  
468 characteristic patterns of temporal regulation in HIV-1-infected T cells [50,51,53]. Accordingly, the  
469 temporal expression profile of plasma membrane EWI-2 was strikingly similar to that of BST2  
470 (Tetherin), a canonical Vpu target (Figure 4A).

471 Furthermore, like BST2, depletion of cell surface EWI-2 by HIV-1 infection was abrogated in the  
472 presence of reverse transcriptase inhibitors, and when cells were infected with Vpu-deficient HIV-1  
473 (Figure 4B). Taken together, our proteomic data therefore strongly suggest that Vpu is primarily  
474 responsible for HIV-1-dependent EWI-2 downregulation. As with the tetraspanins, however, the  
475 incomplete rescue in the presence of Vpu-deficient virus, and relatively modest depletion when Vpu  
476 was expressed as a single gene (Figure 4B), suggest that Nef may also contribute to depletion of cell  
477 surface EWI-2 in the context of HIV-1 infection.

### 478 *3.3 EWI-2 inhibits HIV-1-induced syncytium formation*

479 Likely through their accumulation at the producer cell side of the VS, the EWI-2 partner proteins  
480 CD81 and ezrin repress fusion of infected and uninfected cells, i.e. syncytium formation [22-24]. Given

481 that EWI-2 also accumulates at the VS (Figure 1), we sought to test whether it also contributes to the  
482 inhibition of HIV-1-induced syncytium formation by reducing its expression using RNA interference.

483 We established an EWI-2 knockdown CEM-SS cell line by lentiviral transduction using a targeting  
484 vector (FG12) that directs expression of a short hairpin RNA (shRNA) targeting EWI-2 (shEWI-2), using  
485 the same targeting sequence as in a previous report [32]. As a control, this targeting sequence was  
486 scrambled several times, all resulting sequences were tested against the human genome by BLASTn,  
487 and the sequence with the least homology to any human transcript was selected (shScramble, or shScr).  
488 This modified FG12 vector also carries a puromycin resistance cassette, while the GFP reporter cassette  
489 (as used in [24]) was removed to allow use of GFP reporter viruses. The puromycin-resistant shEWI-2  
490 CEM-SS cells were analyzed by microscopy (Figure 5A) and by flow cytometry (Figure 5B-C), and were  
491 found to have ~3-fold reduced EWI-2 surface levels, compared to both the shScramble control and the  
492 parental non-transduced CEM-SS cells.

493 shEWI-2 and shScramble cells were then assayed for their ability to support HIV-1-induced cell-  
494 cell fusion with CEM-luc cells as target cells, using a previously reported assay that discriminates  
495 between the luciferase signal derived from active virus transmission and signal from cell-cell fusion  
496 [24,59]. Across three independent biological replicates, HIV-1-infected shEWI-2 cells were found to  
497 form syncytia considerably more frequently (~1.8-fold) than HIV-1-infected shScramble cells (Figure  
498 5D).

499 In parallel, and as we have done previously to examine the fusion-inhibitory capacity of  
500 tetraspanins [22,23], we tested whether EWI-2 inhibits HIV-1-induced syncytium formation in a dose-  
501 dependent manner by overexpressing EWI-2 in HeLa cells (which have nearly-undetectable  
502 endogenous levels of EWI-2). NL-sfGI-producing HeLa cells overexpressing either EWI-2, CD81, or L6  
503 (a tetraspanin-like surface protein that does not repress HIV-1-induced cell-cell fusion; [23,60]) were  
504 co-cultured with uninfected target TZM-bl cells. As a negative control for HIV-1-induced cell-cell  
505 fusion, Env-deleted ( $\Delta$ Env) NL-sfGI-expressing HeLa cells were also co-cultured with target TZM-bl  
506 cells. HIV-1-induced HeLa-TZM-bl syncytia express firefly luciferase under control of the HIV-1 LTR  
507 [22]. After 3 h of co-culture (and another 14-18 h to allow for reporter expression), cells were lysed, the  
508 lysates were incubated with luciferase substrate, and luminescence was measured using a microplate  
509 reader. Overexpression of increasing amounts of EWI-2 (125, 250, or 500 ng of plasmid) in NL-sfGI-  
510 producing cells resulted in robust and dose-dependent decrease of cell-cell fusion (at 250 and 500 ng of  
511 input plasmid), though repression was not as extensive as that observed upon CD81 overexpression  
512 (Figure 5E).

513 Taken together, the accumulation of EWI-2 at the presynaptic terminal of the HIV-1 VS (Figures 1-  
514 2), the concomitant overall downregulation of EWI-2 in infected T cells (Figure 3), and the requirement  
515 for high EWI-2 expression for efficient control of Env-induced cell-cell fusion (Figure 5) establish EWI-  
516 2 as a host fusion-inhibitory protein harnessed by HIV-1 during cell-to-cell virus transmission.

### 517 3.4 EWI-2 and CD81 surface expression is restored on HIV-1-induced syncytia

518 HIV-1-infected cells have been well documented to have altered surface expression profiles  
519 compared to uninfected cells (reviewed in [61]). However, previous analyses (including ours) were  
520 performed using bulk populations of HIV-1 infected cells, and thus could not or did not discriminate  
521 between mono- and multinucleated HIV-1-infected cells. HIV-1-induced syncytia likely have altered  
522 surface expression compared to mononucleated infected cells, as the process of syncytium formation  
523 (infected-uninfected cell fusion) provides a sudden influx of yet-to-be downregulated host proteins  
524 contributed by the uninfected target cell upon membrane merger and cytoplasm mixing. Therefore, we  
525 chose to use microscopy to analyze the surface expression of EWI-2 and CD81 on HIV-1-infected cells  
526 in order to, for the first time, confidently discriminate between mononucleated infected cells and  
527 multinucleated HIV-1-induced syncytia.

528 HIV-1-infected primary CD4<sup>+</sup> T cells were cultured for three days post infection to allow time for  
529 syncytium formation. Infected cells were plated, surface-labeled for EWI-2 or CD81 on ice, and fixed  
530 prior to incubation with secondary antibody and imaging as before. The surface expression of each cell

531 was quantified, normalized to internal uninfected controls, and data were segregated into populations  
532 of uninfected cells, mononucleated infected cells, and multinucleated infected cells (syncytia, identified  
533 as multinucleated by DAPI nuclear staining and positive for the viral reporter (GFP), as shown in  
534 representative images; Figure 6A). Strikingly, we found that syncytia had restored surface expression  
535 of both EWI-2 and CD81, back to nearly the same level as uninfected T cells found within the same  
536 wells (Figure 6B).

#### 537 4. Discussion

538 Transient alignment of infected (producer) and uninfected (target) cells allows for efficient  
539 transmission of virus particles. However, because of the presence of viral Env and CD4/co-receptor at  
540 the surface of producer and target cell, respectively, rather than separating after particle transfer, these  
541 cells could also easily fuse with each other, thus forming a syncytium. This study now identifies EWI-  
542 2 as a host protein that contributes to maintenance of viral homeostasis through fusion inhibition.

543 Our investigations were partially prompted by two recent reports. In one of those studies,  
544 Rubinstein and colleagues documented a role for EWI-F, a close relative of EWI-2, in myoblast fusion  
545 regulation [26]. EWI-F was shown to act as fusion repressor in cooperation with the tetraspanins CD9  
546 and CD81. With the other study, Yáñez-Mó and colleagues [32] showed the presence of EWI-2 at sites  
547 of contact between uninfected T cells and T cells stably expressing HIV-1 Env. In separate experiments,  
548 HIV-1-infected EWI-2 knockdown cells were also shown to have somewhat increased virus production  
549 and the authors mentioned (as data not shown) that this was accompanied by augmented syncytium  
550 formation, indicating that EWI-2 could be involved in the regulation of HIV-1-induced membrane  
551 fusion. Importantly, however, the study did not address the question of whether the reported increase  
552 in syncytium formation was (potentially) caused by the action of EWI-2 in producer or target cells, nor  
553 did it provide a dissection of where EWI-2 accumulates (producer and/or target cells). The authors did  
554 speculate that EWI-2, together with  $\alpha$ -actinin, might be active in target cells, there possibly contributing  
555 to  $\alpha$ -actinin's actin bundling activity, thus ultimately inhibiting virus entry/fusion. They also explicitly  
556 stated, however, that even if their speculation about where  $\alpha$ -actinin acts during virus replication  
557 should eventually turn out to be confirmed (with subsequent studies), they cannot exclude an  
558 involvement of the partner protein EWI-2 in "subsequent steps of the viral life cycle". Our study now  
559 reveals that EWI-2 indeed acts during the late phase of the HIV-1 replication cycle: It accumulates on  
560 the producer cell side of the VS (Figures 1-2). Surprisingly, unlike tetraspanins, which have fusion-  
561 inhibitory roles at both sides of the VS (and thus are present at both the viral pre- and postsynapse  
562 [22,62]), EWI-2 accumulates (and inhibits fusion) only at the presynaptic terminal of the VS. This leads  
563 us to speculate whether EWI-2 accumulation at the presynaptic terminal might contribute to unique  
564 intracellular signaling events in HIV-1-infected cells [32,63], such as tuning T cell receptor function.

565 Paralleling what we previously documented for tetraspanins [22], we found that fusion with  
566 uninfected target cells was inhibited by EWI-2, and we established that it does so in a dose-dependent  
567 manner (Figure 5). Also analogous to our findings about tetraspanins [54,56], we demonstrate that  
568 while EWI-2 accumulates at the virological presynapse, overall this protein is downregulated in  
569 infected cells (Figure 3). Our proteomic analysis (Figure 4) now shows that EWI-2 depletion from the  
570 infected cell surface, as is also the case for tetraspanins [56,57], is primarily mediated by Vpu (Figure  
571 4). Since EWI-2 is a known interactor of tetraspanins CD81 and CD9, it is possible that EWI-2  
572 downregulation by Vpu (with or without Nef) is "direct" (like e.g. the canonical Vpu "targets" BST2  
573 and CD4, as well as SNAT1 [53]) or "indirect," possibly through its association with tetraspanins. Note,  
574 this is also true of CD81/other tetraspanins, which may likewise be "direct" or "indirect" targets (e.g.  
575 by their association with EWI-2). Our data do not distinguish these possibilities, and further  
576 mechanistic studies would be required to delineate the detailed mechanism of Vpu-mediated depletion.  
577 It should also be noted that in Table S1 of [64], EWI-2 depletion in CEM-T4 cells is (somewhat)  
578 dependent on the expression of Vpr. The effect size is modest and likely "indirect", and does not  
579 contradict the Vpu and Nef data shown here. It does, however, suggest that the mechanism of EWI-2  
580 depletion in HIV-1 infected T cells may be complex.



581 Overall, the combination of these two features (enrichment during assembly and transmission at  
582 the VS, and regulation by HIV-1 accessory proteins in infected cells), together with the fusion-  
583 preventing functions, strongly suggests that a particular host factor plays an important role in virus  
584 replication.

585 We expect that EWI-2 also inhibits the fusion of virus particles to target cells, as tetraspanins do  
586 [54,56,60], and we are currently testing that hypothesis (within the context of an extensive follow-up  
587 analysis aimed at dissecting the molecular determinants responsible for EWI-2's fusion-inhibitory  
588 functions). It seems likely that tetraspanins and EWI-2 are not only tolerated but indeed enriched at  
589 virus budding sites because the benefit of cell-cell fusion inhibition at the VS is balanced against any  
590 negative effect of a reduction in virus infectivity. This is demonstrated by the fact that, in a native  
591 (unmanipulated) context, it is simultaneously true that (A) HIV-1-infected T cells routinely exhibit  
592 enrichment of these fusion inhibitors at virus release sites, (B) that cell-cell fusion is relatively  
593 infrequent, and (C) that HIV-1 spreads efficiently in those cell cultures.

594 As mentioned, while fusion inhibition operates at many levels and is orchestrated by HIV-1  
595 proteins during infection, syncytia do nevertheless form, including *in vivo* [7-9] and when using a  
596 transmitted/founder (T/F) R5-tropic Env or even full-length replication-competent T/F virus [10,12].  
597 However, these syncytia seem to remain small, at 4 or fewer nuclei and the vast majority having only  
598 2 nuclei [9]. Very large syncytia (dozens to thousands of nuclei) are only induced by HIV-1 infection of  
599 certain T cell lines, especially Sup-T1 cells [65], or *in vivo* but only with the involvement of macrophage  
600 or dendritic cells [66-68]. It is therefore possible that T cell-T cell fusion is inhibited not only when a  
601 mononucleated infected cell encounters a target cell, but also when a syncytium encounters a target  
602 cell. An alternative explanation is that syncytia may be less viable as they grow larger, though some  
603 evidence contradicts that [69]. Here, we present evidence that host fusion-inhibitory proteins EWI-2  
604 and CD81 are present at higher levels on the surface of small T cell syncytia when compared to  
605 mononucleated infected cells in the same culture. Because we find that the fusion-inhibitory capacity  
606 of EWI-2 and CD81 is also dose-dependent, it would therefore be expected that a higher "dose" of EWI-  
607 2 and/or CD81 in syncytia would make them less likely to undergo cell-cell fusion a second (or third)  
608 time. We are currently formally testing this hypothesis, and also investigating the surface levels on  
609 syncytia of other host proteins normally downregulated upon HIV-1 infection. Without implicating  
610 any particular fusion-inhibitory protein, we have in the past found evidence that indeed fusion-  
611 inhibitory factors may also be acting at syncytium-target cell VSs [9]: in Movie S7 of that report, we  
612 showed an example of a small syncytium containing 2 nuclei undergoing cell-cell fusion and acquiring  
613 a third nucleus. Subsequently, that syncytium encountered uninfected target cells and transferred virus  
614 particles to them through close contact, but did not undergo further cell-cell fusion and instead fully  
615 separated from them despite exhibiting the ability to fuse only hours earlier. We can now speculate  
616 that, as a result of the cell-cell fusion event we captured at the beginning of that sequence, this  
617 syncytium likely acquired a dose of EWI-2 and/or CD81, which subsequently allowed the syncytium to  
618 mediate cell-to-cell virus transfer at the VS without further cell-cell fusion.

619 Finally, repressing HIV-1 Env-induced cell-cell fusion not only allows for continued increase in  
620 the number of infected cells (as that number doubles each time producer and target cells separate after  
621 virus transmission), keeping Env's fusion activity at bay may also be beneficial for the virus for other  
622 reasons. For instance, we and others have recently shown that lowering Env's fusion activity also allows  
623 HIV-1 to overcome a restriction factor (APOBEC3G; [59]), and even antiviral drugs [70]. Further, large  
624 syncytia, that could form if Env-induced cell-cell fusion is uncontrolled, are likely prone to be attacked  
625 by innate immune cells. It is therefore critical that HIV-1 recruits fusion-inhibitory host factors such as  
626 EWI-2 to the VS to prevent excess cell-cell fusion and keep T cell syncytia small when they do form.

627 **Author Contributions:** E.E.W., N.J.M., M.S., and M.T. conceived and designed the experiments. E.E.W. performed  
628 the experiments and analyzed the results, with contributions by M.S. and P.B.M. in Figure 1. N.J.M. performed the  
629 proteomics and analyzed the results in Figure 3A and Figure 4. S.P. performed the FG12 vector modification to  
630 remove the GFP reporter cassette. E.E.W., N.J.M., and M.S. prepared the figures. E.E.W., N.J.M., M.S., and M.T.  
631 wrote and edited the manuscript.

632 **Funding:** The work was supported by the National Institutes of Health (R01-GM117839 to M.T., P30-RR032135 and  
633 P30-GM103498 for the Neuroscience COBRE Imaging Facility), the University of Vermont Larner College of  
634 Medicine (Bridge Support Grant to M.T.), the University of Vermont Department of Microbiology & Molecular  
635 Genetics (Nicole J. Ferland Award to S.P.), the Medical Research Council (CSF MR/P008801/1 to N.J.M.), NHS  
636 Blood and Transplant (WPA15-02 to N.J.M.), the NIHR Cambridge BRC, and a Wellcome Trust Strategic Award  
637 to CIMR. The contents are solely the responsibility of the authors and do not necessarily represent the official views  
638 of these funding sources.

639 **Acknowledgments:** The flow cytometry data we presented were obtained at the Harry Hood Bassett Flow  
640 Cytometry and Cell Sorting Facility, Larner College of Medicine, University of Vermont. The imaging shown in  
641 Figure 1A was performed at the Imaging/Physiology Core Facility, Neuroscience Center of Biomedical Research  
642 Excellence, Larner College of Medicine, University of Vermont.

643 **Conflicts of Interest:** The authors declare no competing commercial or financial interests.

644 **References**

- 645 1. Jolly, C.; Kashefi, K.; Hollinshead, M.; Sattentau, Q.J. HIV-1 cell to cell transfer across an Env-induced,  
646 actin-dependent synapse. *J Exp Med* **2004**, *199*, 283-293, doi:10.1084/jem.20030648.
- 647 2. Hubner, W.; McEnerney, G.P.; Chen, P.; Dale, B.M.; Gordon, R.E.; Chuang, F.Y.; Li, X.D.; Asmuth, D.M.;  
648 Huser, T.; Chen, B.K. Quantitative 3D video microscopy of HIV transfer across T cell virological  
649 synapses. *Science* **2009**, *323*, 1743-1747, doi:10.1126/science.1167525.
- 650 3. Ladinsky, M.S.; Kieffer, C.; Olson, G.; Deruaz, M.; Vrbanac, V.; Tager, A.M.; Kwon, D.S.; Bjorkman, P.J.  
651 Electron tomography of HIV-1 infection in gut-associated lymphoid tissue. *PLoS Pathog* **2014**, *10*,  
652 e1003899, doi:10.1371/journal.ppat.1003899.
- 653 4. Reh, L.; Magnus, C.; Schanz, M.; Weber, J.; Uhr, T.; Rusert, P.; Trkola, A. Capacity of Broadly  
654 Neutralizing Antibodies to Inhibit HIV-1 Cell-Cell Transmission Is Strain- and Epitope-Dependent.  
655 *PLoS Pathog* **2015**, *11*, e1004966, doi:10.1371/journal.ppat.1004966.
- 656 5. Bracq, L.; Xie, M.; Benichou, S.; Bouchet, J. Mechanisms for Cell-to-Cell Transmission of HIV-1. *Front*  
657 *Immunol* **2018**, *9*, 260, doi:10.3389/fimmu.2018.00260.
- 658 6. Imle, A.; Kumberger, P.; Schnellbacher, N.D.; Fehr, J.; Carrillo-Bustamante, P.; Ales, J.; Schmidt, P.;  
659 Ritter, C.; Godinez, W.J.; Muller, B., et al. Experimental and computational analyses reveal that  
660 environmental restrictions shape HIV-1 spread in 3D cultures. *Nat Commun* **2019**, *10*, 2144,  
661 doi:10.1038/s41467-019-09879-3.
- 662 7. Orenstein, J.M. In vivo cytolysis and fusion of human immunodeficiency virus type 1-infected  
663 lymphocytes in lymphoid tissue. *J Infect Dis* **2000**, *182*, 338-342, doi:10.1086/315640.
- 664 8. Murooka, T.T.; Deruaz, M.; Marangoni, F.; Vrbanac, V.D.; Seung, E.; von Andrian, U.H.; Tager, A.M.;  
665 Luster, A.D.; Mempel, T.R. HIV-infected T cells are migratory vehicles for viral dissemination. *Nature*  
666 **2012**, *490*, 283-287, doi:10.1038/nature11398.
- 667 9. Symeonides, M.; Murooka, T.T.; Bellfy, L.N.; Roy, N.H.; Mempel, T.R.; Thali, M. HIV-1-Induced Small T  
668 Cell Syncytia Can Transfer Virus Particles to Target Cells through Transient Contacts. *Viruses* **2015**, *7*,  
669 6590-6603, doi:10.3390/v7122959.
- 670 10. Law, K.M.; Komarova, N.L.; Yewdall, A.W.; Lee, R.K.; Herrera, O.L.; Wodarz, D.; Chen, B.K. In Vivo  
671 HIV-1 Cell-to-Cell Transmission Promotes Multicopy Micro-compartmentalized Infection. *Cell Rep* **2016**,  
672 *15*, 2771-2783, doi:10.1016/j.celrep.2016.05.059.
- 673 11. Uchil, P.D.; Haugh, K.A.; Pi, R.; Mothes, W. In Vivo Imaging-Driven Approaches to Study Virus  
674 Dissemination and Pathogenesis. *Annu Rev Virol* **2019**, *6*, 501-524, doi:10.1146/annurev-virology-101416-  
675 041429.
- 676 12. Ventura, J.D.; Beloor, J.; Allen, E.; Zhang, T.; Haugh, K.A.; Uchil, P.D.; Ochsenbauer, C.; Kieffer, C.;  
677 Kumar, P.; Hope, T.J., et al. Longitudinal bioluminescent imaging of HIV-1 infection during  
678 antiretroviral therapy and treatment interruption in humanized mice. *bioRxiv* **2019**, 10.1101/745125,  
679 745125, doi:10.1101/745125.
- 680 13. Alvarez, R.A.; Barria, M.I.; Chen, B.K. Unique features of HIV-1 spread through T cell virological  
681 synapses. *PLoS Pathog* **2014**, *10*, e1004513, doi:10.1371/journal.ppat.1004513.
- 682 14. Compton, A.A.; Schwartz, O. They Might Be Giants: Does Syncytium Formation Sink or Spread HIV  
683 Infection? *PLoS Pathog* **2017**, *13*, e1006099, doi:10.1371/journal.ppat.1006099.

- 684 15. Rowell, J.F.; Stanhope, P.E.; Siliciano, R.F. Endocytosis of endogenously synthesized HIV-1 envelope  
685 protein. Mechanism and role in processing for association with class II MHC. *J Immunol* **1995**, *155*, 473-  
686 488.
- 687 16. Egan, M.A.; Carruth, L.M.; Rowell, J.F.; Yu, X.; Siliciano, R.F. Human immunodeficiency virus type 1  
688 envelope protein endocytosis mediated by a highly conserved intrinsic internalization signal in the  
689 cytoplasmic domain of gp41 is suppressed in the presence of the Pr55gag precursor protein. *J Virol* **1996**,  
690 *70*, 6547-6556.
- 691 17. Roy, N.H.; Chan, J.; Lambele, M.; Thali, M. Clustering and mobility of HIV-1 Env at viral assembly sites  
692 predict its propensity to induce cell-cell fusion. *J Virol* **2013**, *87*, 7516-7525, doi:10.1128/jvi.00790-13.
- 693 18. Murakami, T.; Ablan, S.; Freed, E.O.; Tanaka, Y. Regulation of human immunodeficiency virus type 1  
694 Env-mediated membrane fusion by viral protease activity. *J Virol* **2004**, *78*, 1026-1031.
- 695 19. Wyma, D.J.; Jiang, J.; Shi, J.; Zhou, J.; Lineberger, J.E.; Miller, M.D.; Aiken, C. Coupling of human  
696 immunodeficiency virus type 1 fusion to virion maturation: a novel role of the gp41 cytoplasmic tail. *J*  
697 *Virol* **2004**, *78*, 3429-3435.
- 698 20. Jiang, J.; Aiken, C. Maturation-dependent human immunodeficiency virus type 1 particle fusion  
699 requires a carboxyl-terminal region of the gp41 cytoplasmic tail. *J Virol* **2007**, *81*, 9999-10008,  
700 doi:10.1128/jvi.00592-07.
- 701 21. Chojnacki, J.; Staudt, T.; Glass, B.; Bingen, P.; Engelhardt, J.; Anders, M.; Schneider, J.; Muller, B.; Hell,  
702 S.W.; Krausslich, H.G. Maturation-dependent HIV-1 surface protein redistribution revealed by  
703 fluorescence nanoscopy. *Science* **2012**, *338*, 524-528, doi:10.1126/science.1226359.
- 704 22. Weng, J.; Kremontsov, D.N.; Khurana, S.; Roy, N.H.; Thali, M. Formation of syncytia is repressed by  
705 tetraspanins in human immunodeficiency virus type 1-producing cells. *J Virol* **2009**, *83*, 7467-7474,  
706 doi:10.1128/jvi.00163-09.
- 707 23. Symeonides, M.; Lambele, M.; Roy, N.H.; Thali, M. Evidence showing that tetraspanins inhibit HIV-1-  
708 induced cell-cell fusion at a post-hemifusion stage. *Viruses* **2014**, *6*, 1078-1090, doi:10.3390/v6031078.
- 709 24. Roy, N.H.; Lambele, M.; Chan, J.; Symeonides, M.; Thali, M. Ezrin is a component of the HIV-1  
710 virological presynapse and contributes to the inhibition of cell-cell fusion. *J Virol* **2014**, *88*, 7645-7658,  
711 doi:10.1128/jvi.00550-14.
- 712 25. Charrin, S.; Le Naour, F.; Oualid, M.; Billard, M.; Faure, G.; Hanash, S.M.; Boucheix, C.; Rubinstein, E.  
713 The major CD9 and CD81 molecular partner. Identification and characterization of the complexes. *J Biol*  
714 *Chem* **2001**, *276*, 14329-14337, doi:10.1074/jbc.M011297200.
- 715 26. Charrin, S.; Latil, M.; Soave, S.; Polesskaya, A.; Chretien, F.; Boucheix, C.; Rubinstein, E. Normal muscle  
716 regeneration requires tight control of muscle cell fusion by tetraspanins CD9 and CD81. *Nat Commun*  
717 **2013**, *4*, 1674, doi:10.1038/ncomms2675.
- 718 27. Sala-Valdes, M.; Ursa, A.; Charrin, S.; Rubinstein, E.; Hemler, M.E.; Sanchez-Madrid, F.; Yanez-Mo, M.  
719 EWI-2 and EWI-F link the tetraspanin web to the actin cytoskeleton through their direct association with  
720 ezrin-radixin-moesin proteins. *J Biol Chem* **2006**, *281*, 19665-19675, doi:10.1074/jbc.M602116200.
- 721 28. Stipp, C.S.; Kolesnikova, T.V.; Hemler, M.E. EWI-2 is a major CD9 and CD81 partner and member of a  
722 novel Ig protein subfamily. *J Biol Chem* **2001**, *276*, 40545-40554, doi:10.1074/jbc.M107338200.
- 723 29. Charrin, S.; Le Naour, F.; Labas, V.; Billard, M.; Le Caer, J.P.; Emile, J.F.; Petit, M.A.; Boucheix, C.;  
724 Rubinstein, E. EWI-2 is a new component of the tetraspanin web in hepatocytes and lymphoid cells.  
725 *Biochem J* **2003**, *373*, 409-421, doi:10.1042/bj20030343.



- 726 30. Rocha-Perugini, V.; Montpellier, C.; Delgrange, D.; Wychowski, C.; Helle, F.; Pillez, A.; Drobecq, H.; Le  
727 Naour, F.; Charrin, S.; Levy, S., et al. The CD81 partner EWI-2wint inhibits hepatitis C virus entry. *PLoS*  
728 *One* **2008**, *3*, e1866, doi:10.1371/journal.pone.0001866.
- 729 31. Montpellier, C.; Tews, B.A.; Poitrimole, J.; Rocha-Perugini, V.; D'Arienzo, V.; Potel, J.; Zhang, X.A.;  
730 Rubinstein, E.; Dubuisson, J.; Cocquerel, L. Interacting regions of CD81 and two of its partners, EWI-2  
731 and EWI-2wint, and their effect on hepatitis C virus infection. *J Biol Chem* **2011**, *286*, 13954-13965,  
732 doi:10.1074/jbc.M111.220103.
- 733 32. Gordon-Alonso, M.; Sala-Valdes, M.; Rocha-Perugini, V.; Perez-Hernandez, D.; Lopez-Martin, S.; Ursa,  
734 A.; Alvarez, S.; Kolesnikova, T.V.; Vazquez, J.; Sanchez-Madrid, F., et al. EWI-2 association with alpha-  
735 actinin regulates T cell immune synapses and HIV viral infection. *J Immunol* **2012**, *189*, 689-700,  
736 doi:10.4049/jimmunol.1103708.
- 737 33. Chen, A.; Leikina, E.; Melikov, K.; Podbilewicz, B.; Kozlov, M.M.; Chernomordik, L.V. Fusion-pore  
738 expansion during syncytium formation is restricted by an actin network. *J Cell Sci* **2008**, *121*, 3619-3628,  
739 doi:10.1242/jcs.032169.
- 740 34. Maddon, P.J.; Dalgleish, A.G.; Mcdougal, J.S.; Clapham, P.R.; Weiss, R.A.; Axel, R. The T4 Gene Encodes  
741 the Aids Virus Receptor and Is Expressed in the Immune-System and the Brain. *Cell* **1986**, *47*, 333-348,  
742 doi:Doi 10.1016/0092-8674(86)90590-8.
- 743 35. Platt, E.J.; Wehrly, K.; Kuhmann, S.E.; Chesebro, B.; Kabat, D. Effects of CCR5 and CD4 cell surface  
744 concentrations on infections by macrophagetropic isolates of human immunodeficiency virus type 1. *J*  
745 *Virol* **1998**, *72*, 2855-2864.
- 746 36. Derdeyn, C.A.; Decker, J.M.; Sfakianos, J.N.; Wu, X.; O'Brien, W.A.; Ratner, L.; Kappes, J.C.; Shaw, G.M.;  
747 Hunter, E. Sensitivity of human immunodeficiency virus type 1 to the fusion inhibitor T-20 is  
748 modulated by coreceptor specificity defined by the V3 loop of gp120. *J Virol* **2000**, *74*, 8358-8367.
- 749 37. Wei, X.; Decker, J.M.; Liu, H.; Zhang, Z.; Arani, R.B.; Kilby, J.M.; Saag, M.S.; Wu, X.; Shaw, G.M.;  
750 Kappes, J.C. Emergence of resistant human immunodeficiency virus type 1 in patients receiving fusion  
751 inhibitor (T-20) monotherapy. *Antimicrob. Agents Chemother.* **2002**, *46*, 1896-1905.
- 752 38. Takeuchi, Y.; McClure, M.O.; Pizzato, M. Identification of gammaretroviruses constitutively released  
753 from cell lines used for human immunodeficiency virus research. *J Virol* **2008**, *82*, 12585-12588,  
754 doi:10.1128/jvi.01726-08.
- 755 39. Platt, E.J.; Bilska, M.; Kozak, S.L.; Kabat, D.; Montefiori, D.C. Evidence that ecotropic murine leukemia  
756 virus contamination in TZM-bl cells does not affect the outcome of neutralizing antibody assays with  
757 human immunodeficiency virus type 1. *J Virol* **2009**, *83*, 8289-8292, doi:10.1128/JVI.00709-09.
- 758 40. Trkola, A.; Matthews, J.; Gordon, C.; Ketas, T.; Moore, J.P. A cell line-based neutralization assay for  
759 primary human immunodeficiency virus type 1 isolates that use either the CCR5 or the CXCR4  
760 coreceptor. *J Virol* **1999**, *73*, 8966-8974.
- 761 41. Spenlehauer, C.; Gordon, C.A.; Trkola, A.; Moore, J.P. A luciferase-reporter gene-expressing T-cell line  
762 facilitates neutralization and drug-sensitivity assays that use either R5 or X4 strains of human  
763 immunodeficiency virus type 1. *Virology* **2001**, *280*, 292-300, doi:10.1006/viro.2000.0780.
- 764 42. Foley, G.E.; Lazarus, H.; Farber, S.; Uzman, B.G.; Boone, B.A.; McCarthy, R.E. Continuous Culture of  
765 Human Lymphoblasts from Peripheral Blood of a Child with Acute Leukemia. *Cancer* **1965**, *18*, 522-529.

- 766 43. Nara, P.L.; Hatch, W.C.; Dunlop, N.M.; Robey, W.G.; Arthur, L.O.; Gonda, M.A.; Fischinger, P.J. Simple,  
767 rapid, quantitative, syncytium-forming microassay for the detection of human immunodeficiency virus  
768 neutralizing antibody. *AIDS Res Hum Retroviruses* **1987**, *3*, 283-302, doi:10.1089/aid.1987.3.283.
- 769 44. Nara, P.L.; Fischinger, P.J. Quantitative infectivity assay for HIV-1 and-2. *Nature* **1988**, *332*, 469-470,  
770 doi:10.1038/332469a0.
- 771 45. Refsland, E.W.; Hultquist, J.F.; Harris, R.S. Endogenous origins of HIV-1 G-to-A hypermutation and  
772 restriction in the nonpermissive T cell line CEM2n. *PLoS Pathog* **2012**, *8*, e1002800,  
773 doi:10.1371/journal.ppat.1002800.
- 774 46. Simm, M.; Shahabuddin, M.; Chao, W.; Allan, J.S.; Volsky, D.J. Aberrant Gag protein composition of a  
775 human immunodeficiency virus type 1 vif mutant produced in primary lymphocytes. *J Virol* **1995**, *69*,  
776 4582-4586.
- 777 47. Freed, E.O.; Martin, M.A. Virion incorporation of envelope glycoproteins with long but not short  
778 cytoplasmic tails is blocked by specific, single amino acid substitutions in the human immunodeficiency  
779 virus type 1 matrix. *J Virol* **1995**, *69*, 1984-1989.
- 780 48. Qin, X.F.; An, D.S.; Chen, I.S.; Baltimore, D. Inhibiting HIV-1 infection in human T cells by lentiviral-  
781 mediated delivery of small interfering RNA against CCR5. *Proc Natl Acad Sci U S A* **2003**, *100*, 183-188,  
782 doi:10.1073/pnas.232688199.
- 783 49. Schindelin, J.; Arganda-Carreras, I.; Frise, E.; Kaynig, V.; Longair, M.; Pietzsch, T.; Preibisch, S.; Rueden,  
784 C.; Saalfeld, S.; Schmid, B., et al. Fiji: an open-source platform for biological-image analysis. *Nat Methods*  
785 **2012**, *9*, 676-682, doi:10.1038/nmeth.2019.
- 786 50. Greenwood, E.J.; Matheson, N.J.; Wals, K.; van den Boomen, D.J.; Antrobus, R.; Williamson, J.C.; Lehner,  
787 P.J. Temporal proteomic analysis of HIV infection reveals remodelling of the host phosphoproteome by  
788 lentiviral Vif variants. *Elife* **2016**, *5*, doi:10.7554/eLife.18296.
- 789 51. Naamati, A.; Williamson, J.C.; Greenwood, E.J.; Marelli, S.; Lehner, P.J.; Matheson, N.J. Functional  
790 proteomic atlas of HIV infection in primary human CD4+ T cells. *Elife* **2019**, *8*, doi:10.7554/eLife.41431.
- 791 52. Matheson, N.J.; Peden, A.A.; Lehner, P.J. Antibody-free magnetic cell sorting of genetically modified  
792 primary human CD4+ T cells by one-step streptavidin affinity purification. *PLoS One* **2014**, *9*, e111437,  
793 doi:10.1371/journal.pone.0111437.
- 794 53. Matheson, N.J.; Sumner, J.; Wals, K.; Rapiteanu, R.; Weekes, M.P.; Vigan, R.; Weinelt, J.; Schindler, M.;  
795 Antrobus, R.; Costa, A.S., et al. Cell Surface Proteomic Map of HIV Infection Reveals Antagonism of  
796 Amino Acid Metabolism by Vpu and Nef. *Cell Host Microbe* **2015**, *18*, 409-423,  
797 doi:10.1016/j.chom.2015.09.003.
- 798 54. Kremontsov, D.N.; Weng, J.; Lambele, M.; Roy, N.H.; Thali, M. Tetraspanins regulate cell-to-cell  
799 transmission of HIV-1. *Retrovirology* **2009**, *6*, 64, doi:10.1186/1742-4690-6-64.
- 800 55. Durham, N.D.; Chen, B.K. HIV-1 Cell-Free and Cell-to-Cell Infections Are Differentially Regulated by  
801 Distinct Determinants in the Env gp41 Cytoplasmic Tail. *J Virol* **2015**, *89*, 9324-9337,  
802 doi:10.1128/JVI.00655-15.
- 803 56. Lambele, M.; Koppensteiner, H.; Symeonides, M.; Roy, N.H.; Chan, J.; Schindler, M.; Thali, M. Vpu is  
804 the main determinant for tetraspanin downregulation in HIV-1-infected cells. *J Virol* **2015**, *89*, 3247-3255,  
805 doi:10.1128/jvi.03719-14.

- 806 57. Haller, C.; Muller, B.; Fritz, J.V.; Lamas-Murua, M.; Stolp, B.; Pujol, F.M.; Keppler, O.T.; Fackler, O.T.  
807 HIV-1 Nef and Vpu are functionally redundant broad-spectrum modulators of cell surface receptors,  
808 including tetraspanins. *J Virol* **2014**, *88*, 14241-14257, doi:10.1128/jvi.02333-14.
- 809 58. Karn, J.; Stoltzfus, C.M. Transcriptional and posttranscriptional regulation of HIV-1 gene expression.  
810 *Cold Spring Harb Perspect Med* **2012**, *2*, a006916, doi:10.1101/cshperspect.a006916.
- 811 59. Ikeda, T.; Symeonides, M.; Albin, J.S.; Li, M.; Thali, M.; Harris, R.S. HIV-1 adaptation studies reveal a  
812 novel Env-mediated homeostasis mechanism for evading lethal hypermutation by APOBEC3G. *PLoS*  
813 *Pathog* **2018**, *14*, e1007010, doi:10.1371/journal.ppat.1007010.
- 814 60. Sato, K.; Aoki, J.; Misawa, N.; Daikoku, E.; Sano, K.; Tanaka, Y.; Koyanagi, Y. Modulation of human  
815 immunodeficiency virus type 1 infectivity through incorporation of tetraspanin proteins. *J Virol* **2008**, *82*,  
816 1021-1033, doi:10.1128/jvi.01044-07.
- 817 61. Sugden, S.M.; Bego, M.G.; Pham, T.N.; Cohen, E.A. Remodeling of the Host Cell Plasma Membrane by  
818 HIV-1 Nef and Vpu: A Strategy to Ensure Viral Fitness and Persistence. *Viruses* **2016**, *8*, 67,  
819 doi:10.3390/v8030067.
- 820 62. Gordon-Alonso, M.; Yanez-Mo, M.; Barreiro, O.; Alvarez, S.; Munoz-Fernandez, M.A.; Valenzuela-  
821 Fernandez, A.; Sanchez-Madrid, F. Tetraspanins CD9 and CD81 modulate HIV-1-induced membrane  
822 fusion. *J Immunol* **2006**, *177*, 5129-5137, doi:10.4049/jimmunol.177.8.5129.
- 823 63. Len, A.C.L.; Starling, S.; Shivkumar, M.; Jolly, C. HIV-1 Activates T Cell Signaling Independently of  
824 Antigen to Drive Viral Spread. *Cell Rep* **2017**, *18*, 1062-1074, doi:10.1016/j.celrep.2016.12.057.
- 825 64. Greenwood, E.J.D.; Williamson, J.C.; Sienkiewicz, A.; Naamati, A.; Matheson, N.J.; Lehner, P.J.  
826 Promiscuous Targeting of Cellular Proteins by Vpr Drives Systems-Level Proteomic Remodeling in  
827 HIV-1 Infection. *Cell Rep* **2019**, *27*, 1579-1596 e1577, doi:10.1016/j.celrep.2019.04.025.
- 828 65. Sylwester, A.; Murphy, S.; Shutt, D.; Soll, D.R. HIV-induced T cell syncytia are self-perpetuating and the  
829 primary cause of T cell death in culture. *J Immunol* **1997**, *158*, 3996-4007.
- 830 66. Rinfret, A.; Latendresse, H.; Lefebvre, R.; St-Louis, G.; Jolicoeur, P.; Lamarre, L. Human  
831 immunodeficiency virus-infected multinucleated histiocytes in oropharyngeal lymphoid tissues from  
832 two asymptomatic patients. *Am J Pathol* **1991**, *138*, 421-426.
- 833 67. Frankel, S.S.; Wenig, B.M.; Burke, A.P.; Mannan, P.; Thompson, L.D.; Abbondanzo, S.L.; Nelson, A.M.;  
834 Pope, M.; Steinman, R.M. Replication of HIV-1 in dendritic cell-derived syncytia at the mucosal surface  
835 of the adenoid. *Science* **1996**, *272*, 115-117, doi:10.1126/science.272.5258.115.
- 836 68. Murooka, T.T.; Sharaf, R.R.; Mempel, T.R. Large Syncytia in Lymph Nodes Induced by CCR5-Tropic  
837 HIV-1. *AIDS Res Hum Retroviruses* **2015**, *31*, 471-472, doi:10.1089/aid.2014.0378.
- 838 69. Sylwester, A.; Daniels, K.; Soll, D.R. The invasive and destructive behavior of HIV-induced T cell  
839 syncytia on collagen and endothelium. *J Leukoc Biol* **1998**, *63*, 233-244, doi:10.1002/jlb.63.2.233.
- 840 70. Van Duyne, R.; Kuo, L.S.; Pham, P.; Fujii, K.; Freed, E.O. Mutations in the HIV-1 envelope glycoprotein  
841 can broadly rescue blocks at multiple steps in the virus replication cycle. *Proc Natl Acad Sci U S A* **2019**,  
842 *116*, 9040-9049, doi:10.1073/pnas.1820333116.

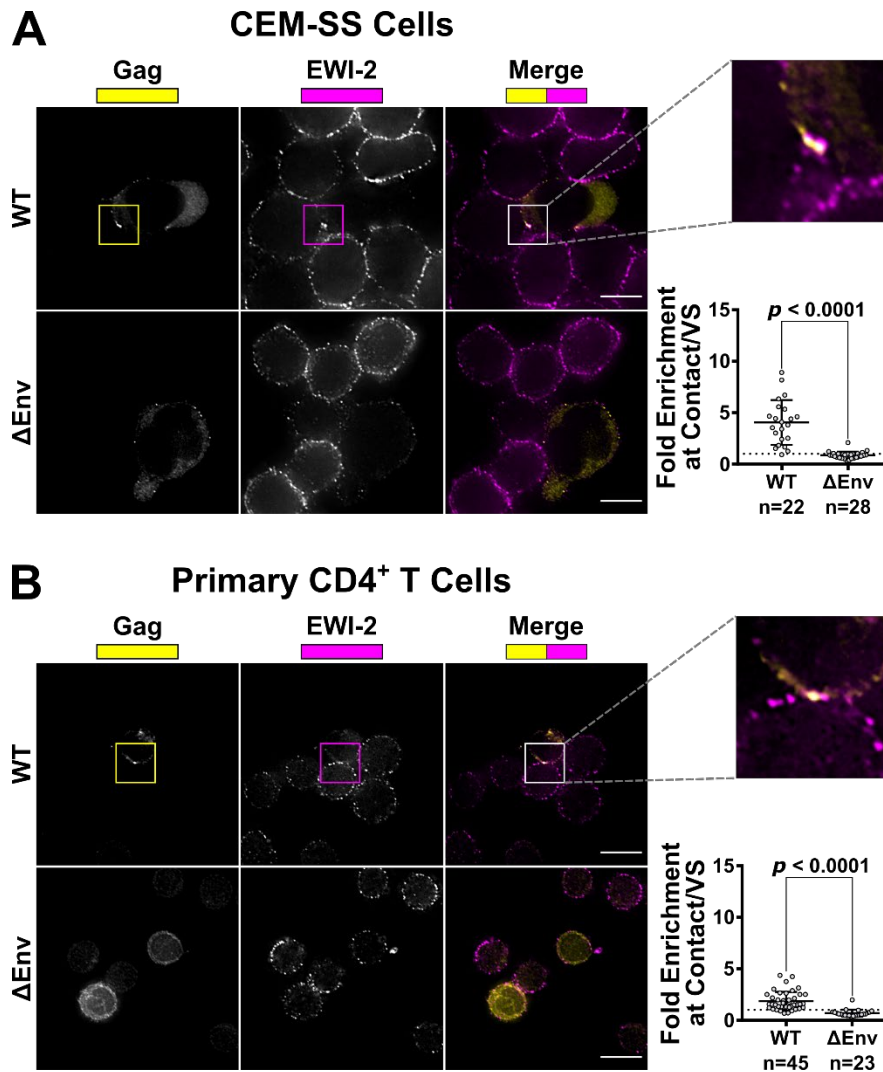

844 **Figure 1.** EWI-2 co-accumulates with Gag at the HIV-1 VS in T cells. (a) CEM-SS cells infected with HIV-1 NL4-3  
845 WT or ΔEnv were co cultured with uninfected CEM-SS target cells for 5 h, and subsequently stained for surface  
846 EWI-2 (magenta) and Gag (yellow). The EWI-2-associated fluorescence intensity at cell-cell contacts either enriched  
847 with Gag (WT) or not Gag-enriched but identified by DIC (ΔEnv) was measured. This value was then divided by  
848 the sum of the EWI-2-associated fluorescence intensity on non-contact sites on the producer and target cell in each  
849 VS/contact to yield EWI-2 enrichment (i.e. the values shown here). The data quantified are from one biological  
850 replicate consisting of two technical replicates. Similar trends were observed in a second dataset; not shown. (b)  
851 Primary CD4<sup>+</sup> T cells infected with NL-sfGI WT or NL-CI ΔEnv were co-cultured with uninfected target primary  
852 cells for 2 h and stained for EWI-2 (magenta) and Gag (yellow), followed by secondary pAbs (Alexa Fluor 647-  
853 conjugated for EWI-2, and either Alexa Fluor 594 or Alexa Fluor 488-conjugated for Gag in the case of WT and  
854 ΔEnv, respectively). Because different secondary antibodies were used for Gag in either condition, the scaling  
855 shown for that channel is not the same across the two conditions, and was based on corresponding no primary and  
856 uninfected controls done alongside each dataset. Enrichment of EWI-2 at Env-dependent (WT) or Env-independent  
857 (ΔEnv) infected-uninfected cell contacts was quantified as described in (a). The data quantified are pooled from  
858 two independent biological replicates, each consisting of two technical replicates. Scale bars = 10 μm. In both data  
859 plots, each data point represents one cell-cell contact site (as opposed to one cell). The dotted horizontal line  
860 indicates a theoretical fold enrichment value of 1, which indicates no enrichment. Error bars = standard deviation  
861 of the mean (SD). *p*-values are the result of two-tailed non-parametric Mann-Whitney *U* tests.



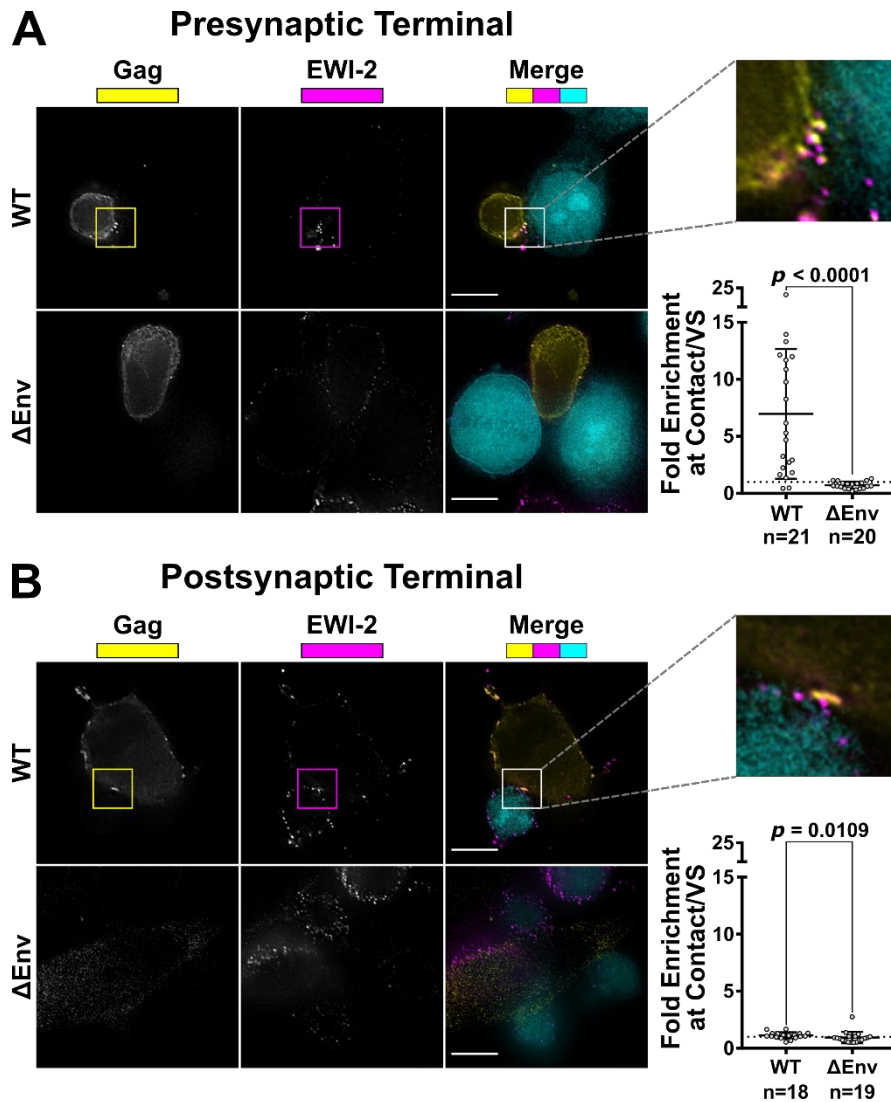

862 **Figure 2.** EWI-2 accumulation takes place on the producer cell side of the VS. (a) To evaluate presynaptic  
863 accumulation of EWI-2, CEM-SS cells infected with HIV-1 NL-CI WT or  $\Delta$ Env were co cultured with CMAC  
864 (cyan) labeled TZM-bl target cells (which have nearly-undetectable EWI-2 surface levels compared to CEM-  
865 SS cells) for 2.5 h, and subsequently stained for surface EWI-2 (magenta) and Gag (yellow). EWI-2 enrichment  
866 was quantified as described in Figure 1. Quantification is the result of pooled VS/contacts from two  
867 independent biological replicates. (b) To evaluate postsynaptic accumulation of EWI-2, HeLa cells (which,  
868 like TZM-bl cells, also have nearly-undetectable EWI-2 surface levels) were transfected with HIV-1 NL-sfGI  
869 or NL-sfGI  $\Delta$ Env and cocultured with uninfected CEM-SS target cells (cyan) for 2-2.5 h. Cells were stained  
870 for surface EWI-2 (magenta) and Gag (yellow). Note that Gag expression in the  $\Delta$ Env condition was quite  
871 low, since Gag expression in this virus is already expected to be considerably reduced [55]. EWI-2 enrichment  
872 was calculated as described in Figure 1. Quantification is the result of pooled VSs/contacts from two  
873 independent biological replicates. Scale bars = 10  $\mu$ m. In both data plots, each dot represents the EWI-2  
874 enrichment value of one VS/contact. The dotted horizontal line indicates a theoretical fold enrichment of 1,  
875 which indicates no enrichment. Error bars = standard deviation of the mean (SD). p-values are the result of  
876 two-tailed non-parametric Mann-Whitney U tests.

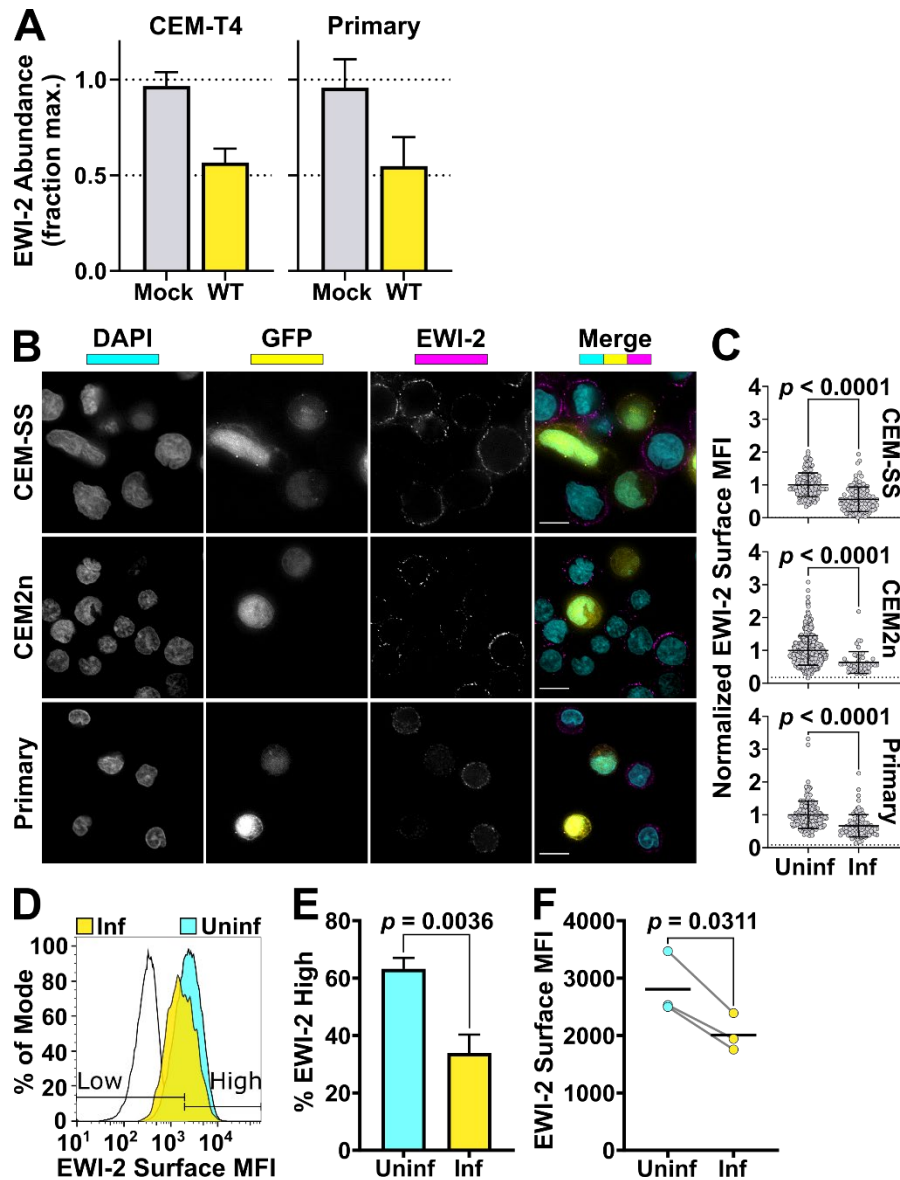

877 **Figure 3.** EWI-2 is downregulated from the surface of infected cells. (a) Abundance of EWI-2 in mock-infected  
 878 (gray) versus WT HIV-infected (yellow) CEM-T4 T cells or primary human CD4<sup>+</sup> T cells. Experiments were  
 879 conducted in triplicate and whole cell lysates subjected to Tandem Mass Tag (TMT)-based quantitative proteomics  
 880 48 h after infection (reanalysis of data from [50] and [51]). 7 (CEM-T4 T cells) or 6 (primary human CD4<sup>+</sup> T cells)  
 881 unique peptides were used for EWI-2 quantitation. Mean relative abundances (fraction of maximum TMT reporter  
 882 ion intensity) with 95% confidence intervals (CIs) shown. (b) Cells were infected with NL-sfGI and surface-labeled  
 883 for EWI-2, fixed, stained with DAPI (shown in cyan) and Alexa Fluor 594-conjugated secondary antibody, and  
 884 imaged. GFP signal (yellow) was used to identify infected cells, and EWI-2-associated signal is shown  
 885 pseudocolored in magenta. Representative cells are shown. Scale bars = 10  $\mu$ m. (c) Cells were prepared as in (b)  
 886 and EWI-2 levels at the plasma membrane in infected (Inf) and uninfected (Uninf) cells were measured by  
 887 manually selecting the plasma membrane at the midline of each cell and quantifying the mean EWI-2-associated  
 888 fluorescence intensity. Fluorescence intensity of each cell was normalized to the average intensity value of  
 889 uninfected cells within the same imaging set. Data shown are pooled from two to three biological replicates, each  
 890 consisting of two technical replicates. Only non-contact sites were quantified. Error bars = SD. *p*-values are the  
 891 result of a two-tailed non-parametric Mann-Whitney *U* test. (C-E) CEM2n cells were infected with NL-sfGI and  
 892 surface-labeled for EWI-2, fixed, and stained with Alexa Fluor 647-conjugated secondary antibody, and analyzed  
 893 by flow cytometry. (d) Representative histogram normalized to mode of the EWI-2 signal intensity at the cell  
 894 surface for unstained controls (black outline), infected cells (yellow), and uninfected cells (cyan). The gates defining  
 895 EWI-2<sup>high</sup> and EWI-2<sup>low</sup> cells are shown. (e) Data represent the percentage of uninfected and infected cells that fell

896 into the EW1-2<sup>high</sup> gate shown in (d) from 3 independent biological replicates, averaged across 2 technical replicates  
897 within each. (f) EW1-2 surface expression was measured by mean fluorescence intensity (MFI) of EW1-2-associated  
898 signal. In both panels, lines connect paired data points, i.e. infected cells and uninfected cells (within an infected  
899 tube) from the same biological replicate. Error bars = SD. *p*-values (E-F) are the result of a two-tailed paired *t* test.

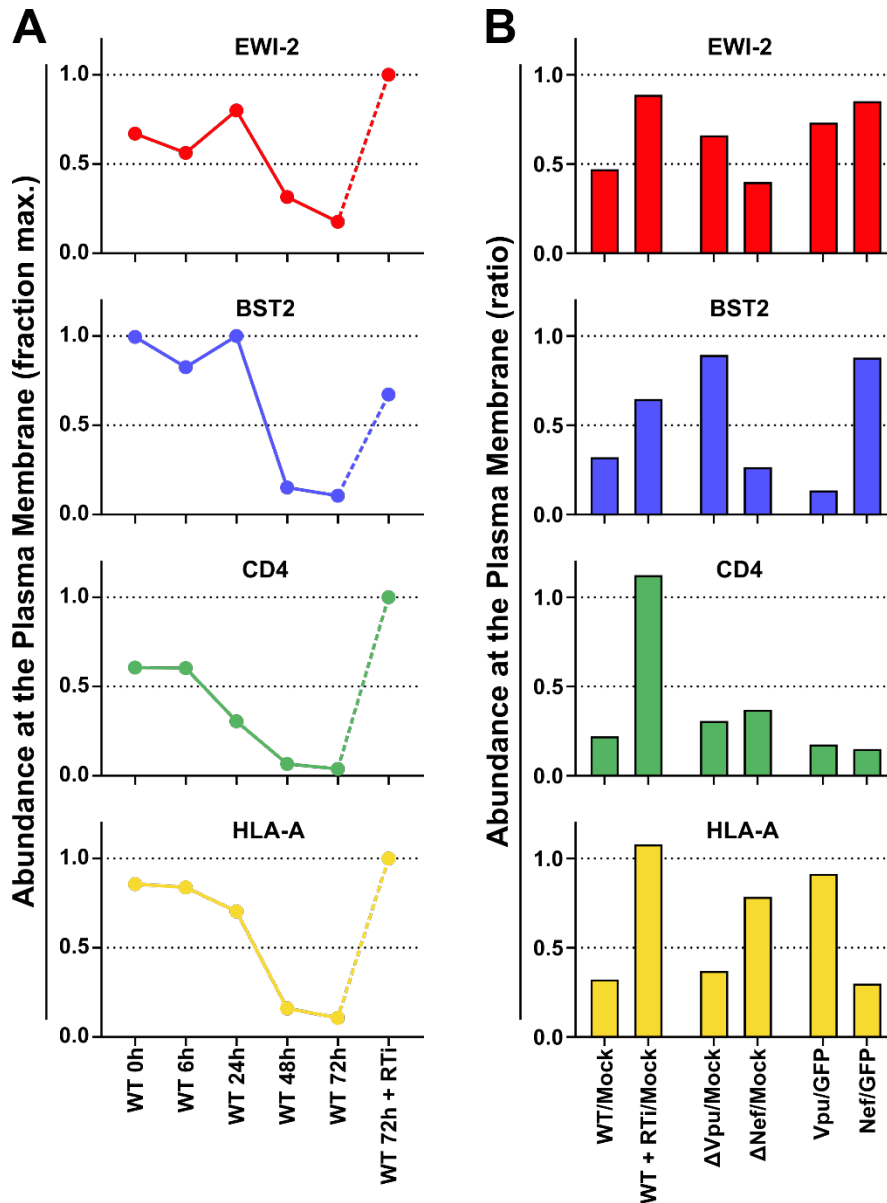

900 **Figure 4.** Plasma membrane EWI-2 is downregulated by Vpu. (a) Temporal expression profiles of cell surface EWI-  
 901 2 (red, upper panel) or indicated control proteins (blue/green/gold, lower panels) in WT HIV-1-infected CEM-T4 T  
 902 cells (reanalysis of data from [53]). Plasma membrane proteins were subjected to TMT-based quantitative  
 903 proteomics 0 (uninfected), 6, 24, 48, and 72 h after infection, or 72 h after infection in the presence of reverse  
 904 transcriptase inhibitors (RTi). 12 unique peptides were used for EWI-2 quantitation. Relative abundances (fraction  
 905 of maximum TMT reporter ion intensity) are shown. (b) Abundance of EWI-2 (red, upper panel) or indicated  
 906 control proteins (blue/green/gold, lower panels) in control CEM-T4 T cells or CEM-T4 T cells infected with WT  
 907 HIV-1 in the presence/absence of RTi, infected with Vpu- or Nef-deficient HIV-1, or transduced with Vpu or Nef  
 908 as single genes (reanalysis of data from [53]). Plasma membrane proteins were subjected to Stable Isotope  
 909 Labelling with Amino acids in Cell culture (SILAC)-based quantitative proteomics 72 h after infection (3 x 3-way  
 910 comparisons). 12 (WT HIV-1 +/- RTi), 9 ( $\Delta$ Vpu/ $\Delta$ Nef HIV-1) or 14 (Vpu/Nef) unique peptides were used for EWI-2  
 911 quantitation. Ratios of abundances to mock-infected CEM-T4 T cells (WT HIV-1 +/- RTi and  $\Delta$ Vpu/ $\Delta$ Nef HIV-1) or  
 912 GFP-transduced CEM-T4 T cells (Vpu/Nef) are shown.



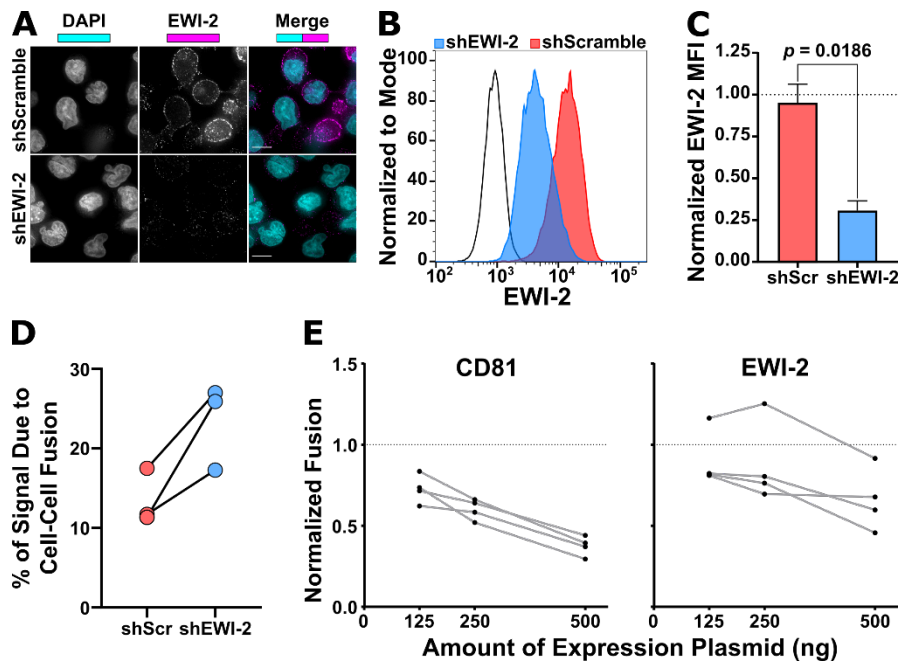

913 **Figure 5.** EWI-2 inhibits infected-uninfected cell fusion. (a-c) EWI-2 expression in shScramble (shScr) and shEWI-  
 914 2 CEM-SS cells was analyzed by microscopy (a) and flow cytometry (b-c). (a) For microscopy, cells were plated  
 915 onto poly-L-lysine-coated glass, fixed, permeabilized, labeled for EWI-2, and stained using fluorescent secondary  
 916 antibody (magenta) and DAPI (cyan). (b-c) For flow cytometry analysis, cells were labeled with Live/Dead Fixable  
 917 Near-IR, fixed, permeabilized, labeled for EWI-2, and stained with fluorescent secondary antibody. (b)  
 918 Representative histogram of the EWI-2 signal intensity normalized to mode in live cells for unstained controls  
 919 (black line), shEWI-2 (blue), and shScr (red) cells. (c) Average EWI-2 MFI in live shScr (red) and shEWI-2 (blue)  
 920 cells from 3 independent biological replicates, normalized to EWI-2-labeled parental CEM-SS cells (represented at  
 921 a value of 1 with a dashed line). Error bars = SD.  $p$ -value is the result of a paired  $t$  test. (d) CEM-luc fusion assays  
 922 were performed using shScr or shEWI-2 producer cells infected with NL4-3, which were co-cultured with CEM-  
 923 luc target cells in the presence of DMSO (vehicle control), EFV (luciferase signal resulting exclusively from cell-cell  
 924 fusion), or EFV + C34 (to inhibit all transmission and cell-cell fusion) alongside parental CEM-SS cells infected with  
 925 NL4-3  $\Delta$ Env co-cultured with CEM-luc cells in the presence of DMSO. Luminescence readings (across 3  
 926 independent biological replicates) from the EFV-treated condition was divided by the DMSO reading from the  
 927 same producer cell type and multiplied by 100 to determine the percentage of luciferase expression dependent on  
 928 cell-cell fusion (syncytium formation) between either shScr or shEWI-2 producer and CEM-luc target cells. Values  
 929 from the same biological replicate are linked by a black line. (e) HeLa-TZM-bl fusion assays were performed using  
 930 producer HeLa cells that were co-transfected with either pNL-sfGI  $\Delta$ Env ( $\Delta$ Env) or pNL-sfGI (WT) in combination  
 931 with either EWI-2, CD81, or L6 overexpression plasmids. Luminescence readings (across 4 independent biological  
 932 replicates, each with 2 technical replicates) were divided by the  $\Delta$ Env condition to obtain the fold increase in fusion,  
 933 and then normalized to the WT co-transfected with L6 condition (thus making L6 have a value of 1, shown as a  
 934 dashed line). Values from the same biological replicate are linked by a grey line.

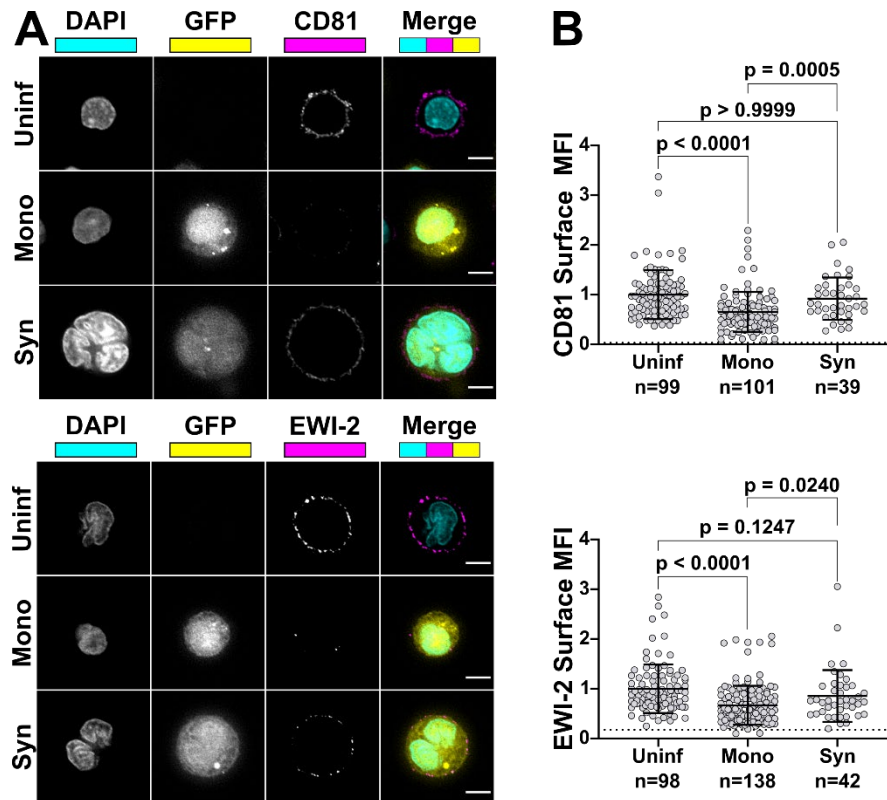

935 **Figure 6.** Syncytia have higher surface expression of EWI-2 and CD81 than mononucleated infected cells. (a)  
936 Primary CD4<sup>+</sup> T cells were infected with NL-sfGI, surface-labeled for either EWI-2 or CD81 (both shown in  
937 magenta), fixed, stained with DAPI (cyan) and AlexaFluor 647-conjugated secondary antibody, and imaged.  
938 Infected cells were identified by GFP (yellow), and discriminated as mono- or multinucleated infected cells by  
939 DAPI. Representative cells are shown. Scale bars = 5  $\mu$ m. (b) Cells were prepared as described in (a) and analyzed  
940 for EWI-2 or CD81 surface expression on uninfected cells, mononucleated infected cells (Mono) and syncytia (Syn)  
941 by manually selecting the plasma membrane at the midline of each cell and quantifying the mean EWI-2 or CD81-  
942 associated fluorescence intensity. Raw fluorescence intensity values were background-subtracted using the  
943 fluorescence intensity of a cell-free area within the same image and subsequently normalized to the average  
944 intensity value of uninfected cells within the same imaging set. Data shown are the pooled normalized intensity  
945 values of two independent biological replicates, each with two technical replicates. Each data point represents the  
946 normalized surface MFI of an individual cell. Error bars = SD. *p*-values are the result of two-tailed non-parametric  
947 Mann-Whitney *U* tests.
